# Supplementary material for: Longitudinal Cervical Length Measurements and Spontaneous Preterm Birth in Singleton and Twin Pregnancies
Source: PubMed Central journal article supplement (PMC11009824; doi:10.1001/jamanetworkopen.2024.4592), 2024-04-11
Supplement: jamanetwopen-e244592-s001.pdf [file jamanetwopen-e244592-s001.pdf]

## Supplemental Online Content

Wu T, Li S, Gong X, et al. Cervical length measurements and spontaneous preterm birth in singleton and twin pregnancies. *JAMA Netw Open*. 2024;7(4):e244592.  
doi:10.1001/jamanetworkopen.2024.4592

**eTable 1.** The Distribution of the Number of Cervical Length Examinations Throughout the Entire Pregnancy for Each Pregnant Woman

**eFigure 1.** The Distribution of the Number of Cervical Length Examinations Throughout the Entire Pregnancy for Each Pregnant Woman

**eTable 2.** The Distribution of the Number of Blood Routine Examinations (White Blood Cell Indicators) Throughout the Entire Pregnancy for Each Pregnant Woman

**eFigure 2.** The Distribution of the Number of Blood Routine Examinations (White Blood Cell Indicators) Throughout the Entire Pregnancy for Each Pregnant Woman

**eTable 3.** Neonatal Outcomes of Singleton Pregnancies

**eTable 4.** Neonatal Outcomes of Twin Pregnancies

**eFigure 3.** Adjusted Rand Index of Longitudinal Clustering of Cervical Length in Singleton Pregnancies

**eFigure 4.** Average Silhouette Value of Longitudinal Clustering of Cervical Length in Singleton Pregnancies

**eFigure 5.** Adjusted Rand Index of Longitudinal Clustering of Cervical Length in Twin Pregnancies

**eFigure 6.** Average Silhouette Value of Longitudinal Clustering of Cervical Length in Twin Pregnancies

**eFigure 7.** Survival Analysis of Gestational Age at Delivery Stratified by Cervical Length Clusters in Singleton and Twin Pregnancies

**eFigure 8.** Gestational Age-Specific Trajectories for Lymphocytes, Basophils, Eosinophils, Lymphocyte-to-Monocyte Ratio Stratified by Cervical Length Clusters in Singleton Pregnancies

**eFigure 9.** Gestational Age-Specific Trajectories for Lymphocytes, Basophils, Eosinophils, Lymphocyte-to-Monocyte Ratio Stratified by Cervical Length Clusters in Twin Pregnancies

**eFigure 10.** Gestational Age-Specific Z-Score for White Blood Cell Indicators in Singleton Pregnancies With Stable Cervix With Reference to Term Birth

**eFigure 11.** Gestational Age-Specific Z-Score for White Blood Cell Indicators in Singleton Pregnancies With Shortened Cervix With Reference to Term Birth

**eFigure 12.** Gestational Age-Specific Z-Score for White Blood Cell Indicators in Twin Pregnancies With Stable Cervix With Reference to Term Birth

**eFigure 13.** Gestational Age-Specific Z-Score for White Blood Cell Indicators in Twin Pregnancies With Shortened Cervix With Reference to Term Birth

**eFigure 14.** The Relationship Between White Blood Cell Indicators and Spontaneous Preterm Birth Stratified by Cervical Length Clusters in Singleton Pregnancies

**eFigure 15.** The Relationship Between White Blood Cell Indicators and Spontaneous Preterm Birth Stratified by Cervical Length Clusters in Twin Pregnancies

**eTable 5.** Likelihood Ratio Test for Between-Group Comparison of White Blood Cell Indicators by Gestational Week of Delivery

**eTable 6.** Estimating the Association Between White Blood Cell Indicators and Spontaneous Preterm Birth Using Logistic Regression With Reference to Term Birth

This supplemental material has been provided by the authors to give readers additional information about their work.

**eTable 1.** The distribution of the number of cervical length examinations throughout the entire pregnancy for each pregnant woman

|                 | The number of cervical length examinations |             |             |             |
|-----------------|--------------------------------------------|-------------|-------------|-------------|
|                 | 2                                          | 3           | 4           | $\geq 5$    |
| Singleton, n(%) | 18209 (49.2)                               | 9407 (25.4) | 5104 (13.8) | 4329 (11.7) |
| Twin, n(%)      | 337 (19.7)                                 | 304 (17.8)  | 333 (19.5)  | 735 (43.0)  |

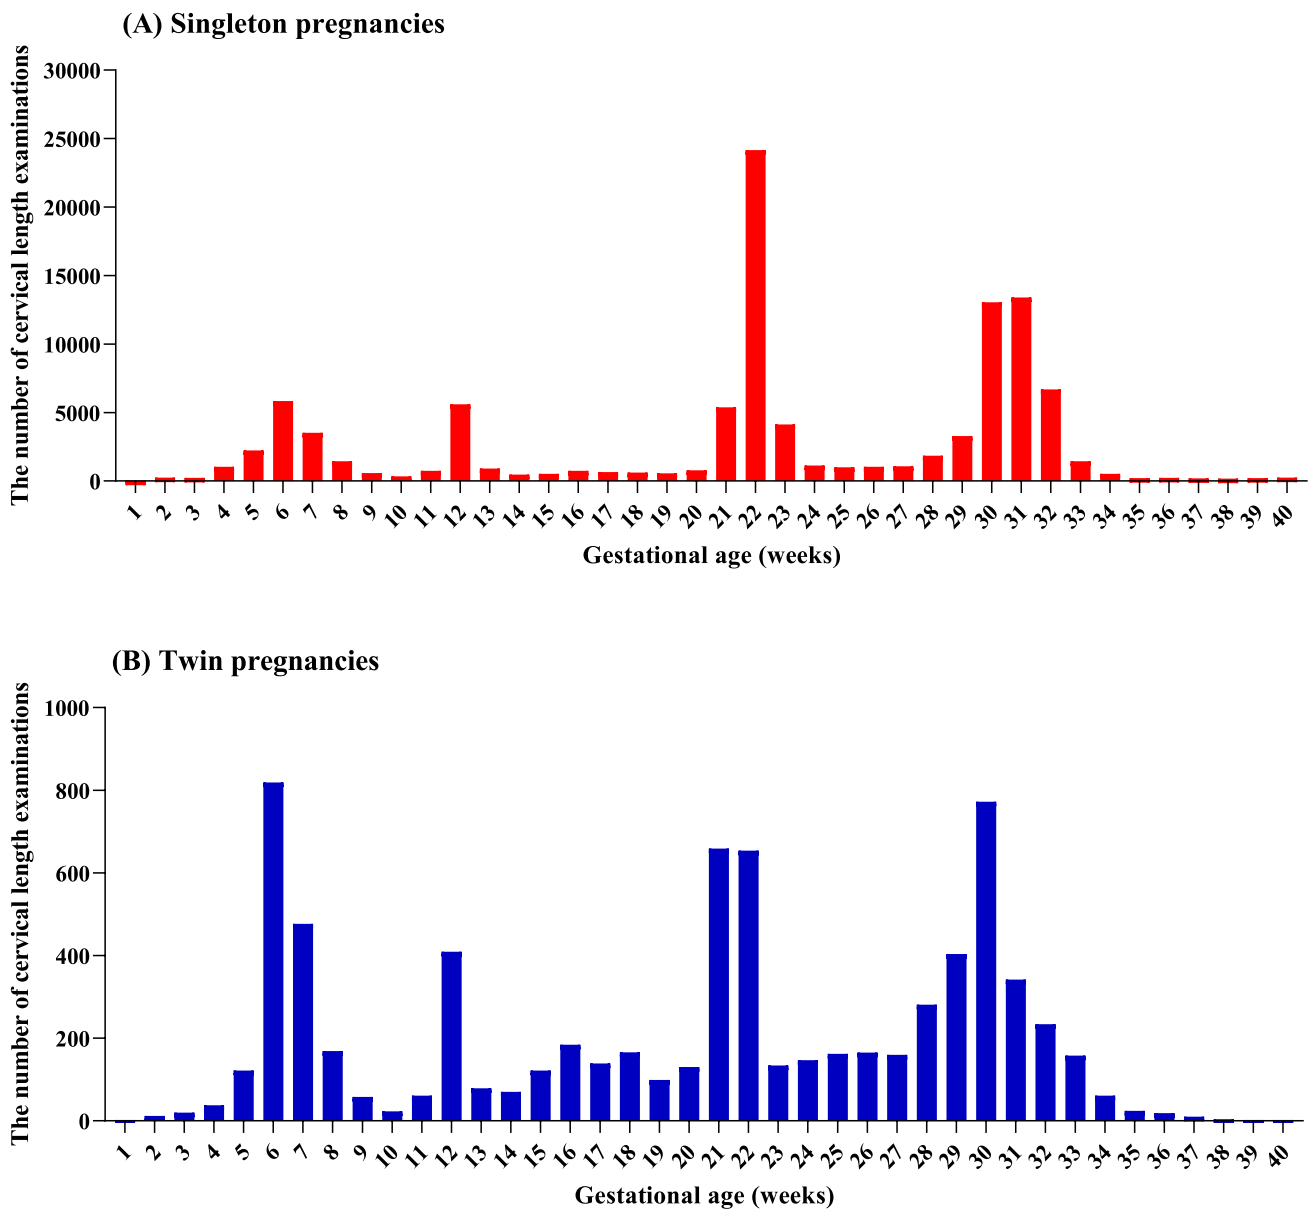

**eFigure 1.** The distribution of the number of cervical length examinations throughout the entire pregnancy for each pregnant woman

**eTable 2.** The distribution of the number of blood routine examinations (white blood cell indicators) throughout the entire pregnancy for each pregnant woman

|            | The number of blood routine examinations (white blood cell indicators) |       |       |       |        |        |        |        |        |       |        |
|------------|------------------------------------------------------------------------|-------|-------|-------|--------|--------|--------|--------|--------|-------|--------|
|            | 2                                                                      | 3     | 4     | 5     | 6      | 7      | 8      | 9      | 10     | 11    | ≥12    |
| Singleton, | 114                                                                    | 753   | 1051  | 2865  | 8056   | 9623   | 7571   | 4605   | 2725   | 1615  | 2692   |
| n(%)       | (0.3)                                                                  | (1.8) | (2.5) | (6.9) | (19.3) | (23.1) | (18.2) | (11.1) | (6.5)  | (3.9) | (6.5)  |
| Twin,      | 1                                                                      | 30    | 59    | 103   | 198    | 291    | 313    | 264    | 187    | 123   | 284    |
| n(%)       | (0.1)                                                                  | (1.6) | (3.2) | (5.6) | (10.7) | (15.7) | (16.9) | (14.3) | (10.1) | (6.6) | (15.3) |

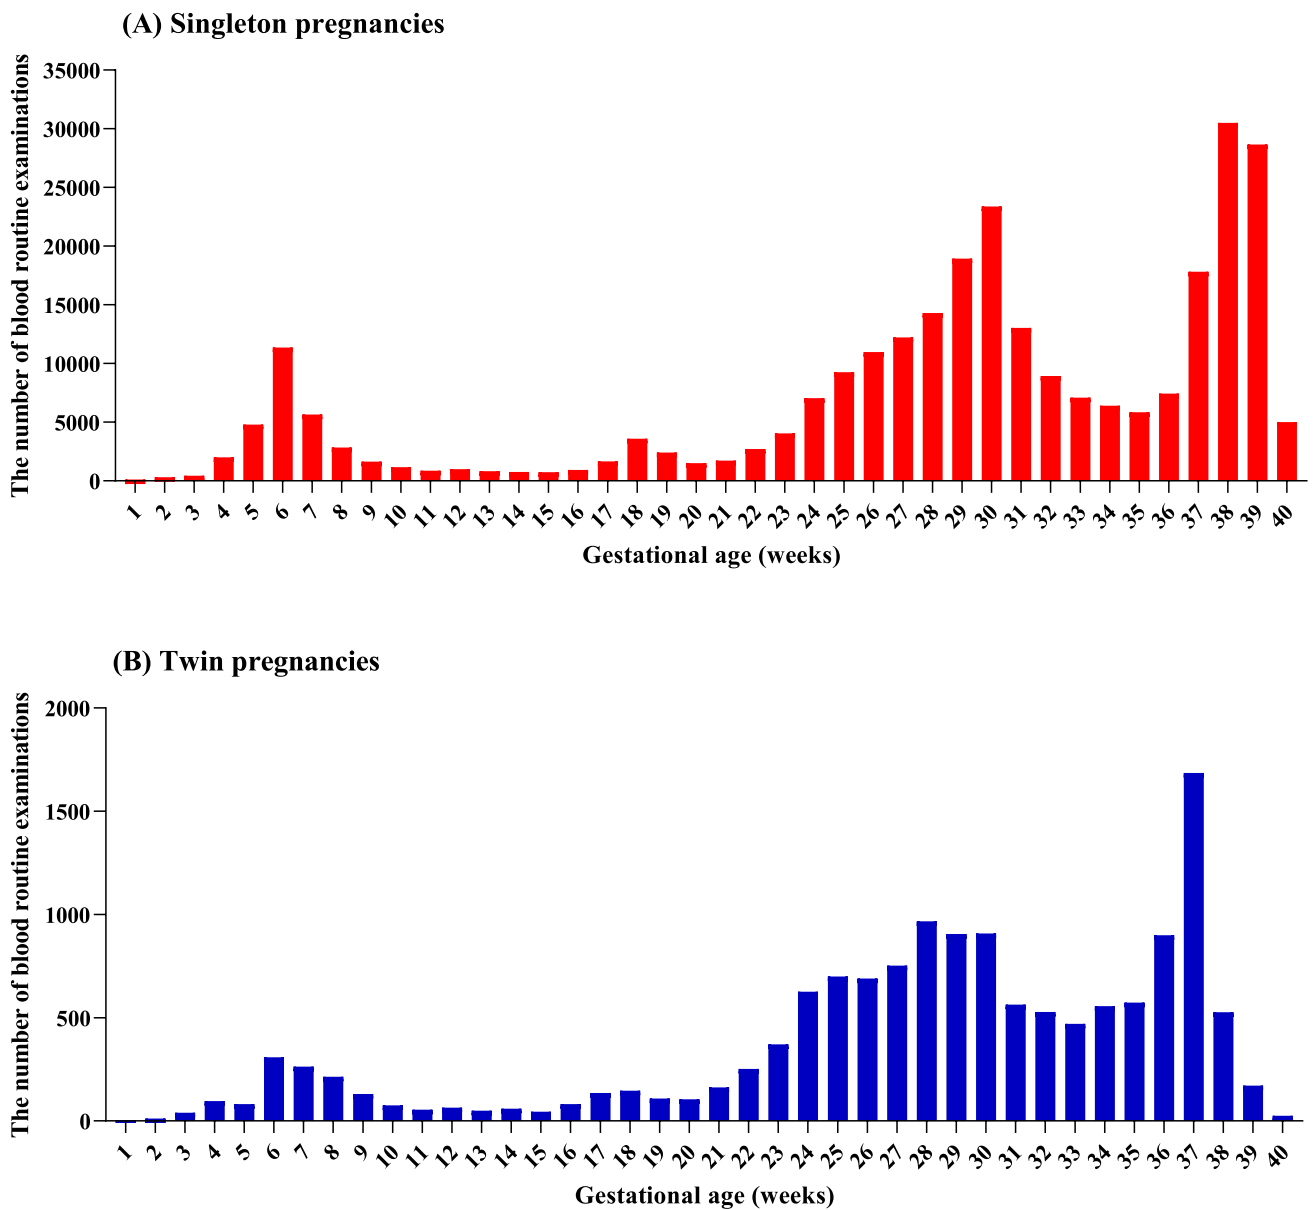

**eFigure 2.** The distribution of the number of blood routine examinations (white blood cell indicators) throughout the entire pregnancy for each pregnant woman

**eTable 3.** Neonatal outcomes of singleton pregnancies

| Neonatal Outcome                   | All<br>(n=43487) | Cervical length     |                        |
|------------------------------------|------------------|---------------------|------------------------|
|                                    |                  | Stable<br>(n=21400) | Shortened<br>(n=22087) |
| Neonatal intensive care unit, n(%) |                  |                     |                        |
| No                                 | 36802 (88.2)     | 17974 (88.4)        | 18828 (88.1)           |
| Yes                                | 4904 (11.8)      | 2366 (11.6)         | 2538 (11.9)            |
| Gender of the newborn, n(%)        |                  |                     |                        |
| Boys                               | 21579 (51.7)     | 10574 (52.0)        | 11005 (51.5)           |
| Girls                              | 20127 (48.3)     | 9766 (48.0)         | 10361 (48.5)           |
| Birth weight, (g)                  | 3312.0±437.1     | 3349.8±426.8        | 3276.0±443.7           |
| Birth length, (cm)                 | 49.5±2.1         | 49.7±2.0            | 49.3±2.2               |
| Small for gestational age, n(%)    |                  |                     |                        |
| No                                 | 39259 (94.1)     | 19310 (94.9)        | 19949 (93.4)           |
| Yes                                | 2447 (5.9)       | 1030 (5.1)          | 1417 (6.6)             |
| Large for gestational age, n(%)    |                  |                     |                        |
| No                                 | 35191 (84.4)     | 16791 (82.6)        | 18400 (86.1)           |
| Yes                                | 6515 (15.6)      | 3549 (17.5)         | 2966 (13.9)            |

**eTable 4.** Neonatal outcomes of twin pregnancies

| Neonatal Outcome                             | All<br>(n=1953) | Cervical length    |                      |
|----------------------------------------------|-----------------|--------------------|----------------------|
|                                              |                 | Stable<br>(n=1369) | Shortened<br>(n=584) |
| Neonatal intensive care unit, n(%)           |                 |                    |                      |
| No                                           | 1423 (76.8)     | 1044 (79.9)        | 379 (69.4)           |
| Yes                                          | 430 (23.2)      | 263 (20.1)         | 167 (30.6)           |
| Gender of the newborn of fetus one, n(%)     |                 |                    |                      |
| Boys                                         | 1017 (54.9)     | 723 (55.3)         | 294 (53.9)           |
| Girls                                        | 836 (45.1)      | 584 (44.7)         | 252 (46.2)           |
| Birth weight of fetus one, (g)               | 2582.9±434.2    | 2639.6±399.0       | 2447.2±482.6         |
| Birth length of fetus one, (cm)              | 46.3±2.9        | 46.7±2.5           | 45.5±3.5             |
| Small for gestational age of fetus one, n(%) |                 |                    |                      |
| No                                           | 1822 (98.3)     | 1284 (98.2)        | 538 (98.5)           |
| Yes                                          | 31 (1.7)        | 23 (1.8)           | 8 (1.5)              |
| Large for gestational age of fetus one, n(%) |                 |                    |                      |
| No                                           | 1503 (81.1)     | 1047 (80.1)        | 456 (83.5)           |
| Yes                                          | 350 (18.9)      | 260 (19.9)         | 90 (16.5)            |
| Gender of the newborn of fetus two, n(%)     |                 |                    |                      |
| Boys                                         | 971 (52.4)      | 690 (52.8)         | 281 (51.5)           |
| Girls                                        | 882 (47.6)      | 617 (47.2)         | 265 (48.5)           |
| Birth weight of fetus two, (g)               | 2528.6±425.9    | 2585.3±396.1       | 2393.0±463.2         |
| Birth length of fetus two, (cm)              | 46.2±2.8        | 46.6±2.6           | 45.4±3.0             |
| Small for gestational age of fetus two, n(%) |                 |                    |                      |
| No                                           | 1782 (96.2)     | 1258 (96.3)        | 524 (96.0)           |
| Yes                                          | 71 (3.8)        | 49 (3.8)           | 22 (4.0)             |
| Large for gestational age of fetus two, n(%) |                 |                    |                      |
| No                                           | 1575 (85.0)     | 1103 (84.4)        | 472 (86.5)           |
| Yes                                          | 278 (15.0)      | 204 (15.6)         | 74 (13.6)            |



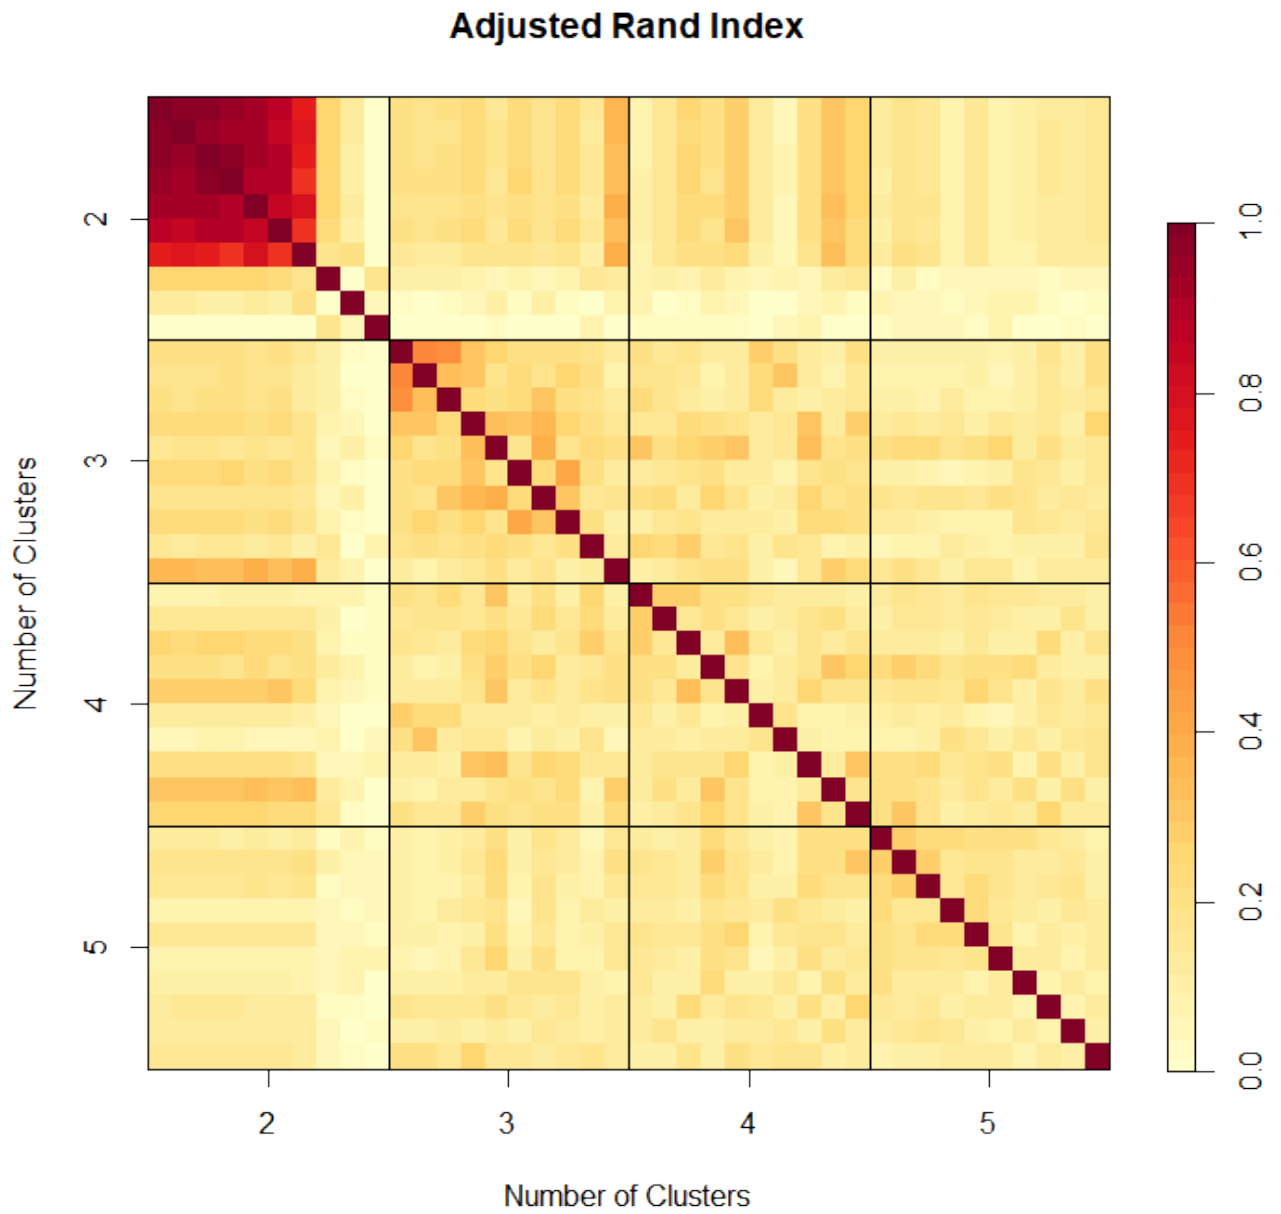

**eFigure 3.** Adjusted Rand index of longitudinal clustering of cervical length in singleton pregnancies

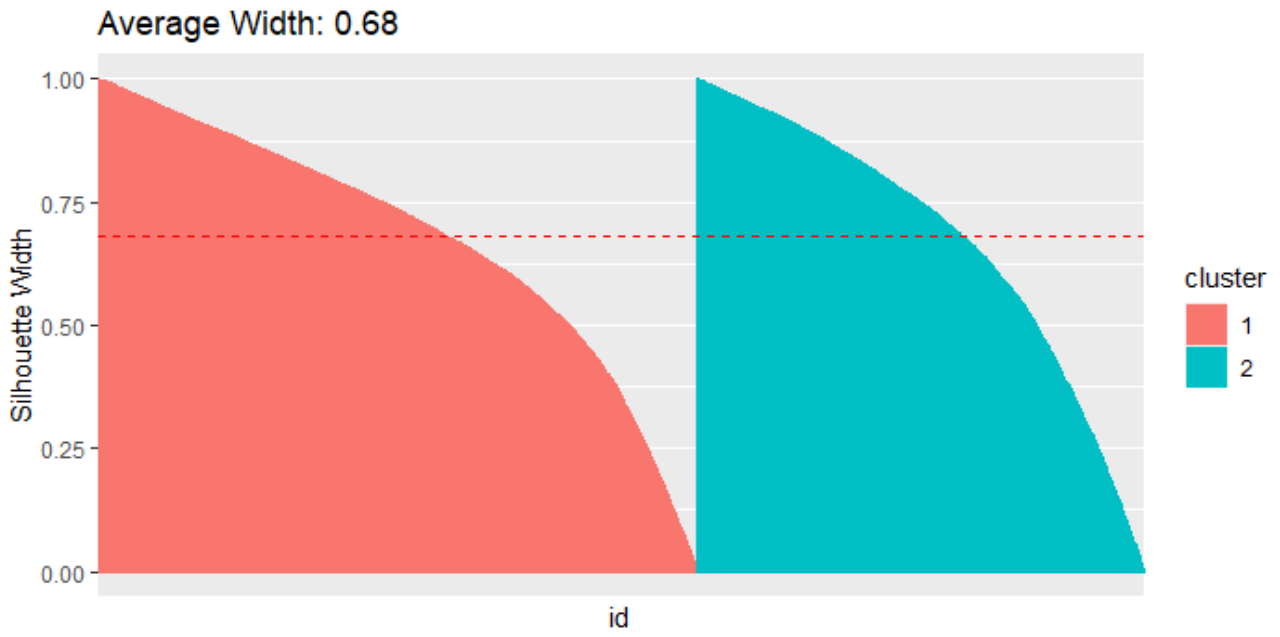

**eFigure 4.** Average silhouette value of longitudinal clustering of cervical length in singleton pregnancies

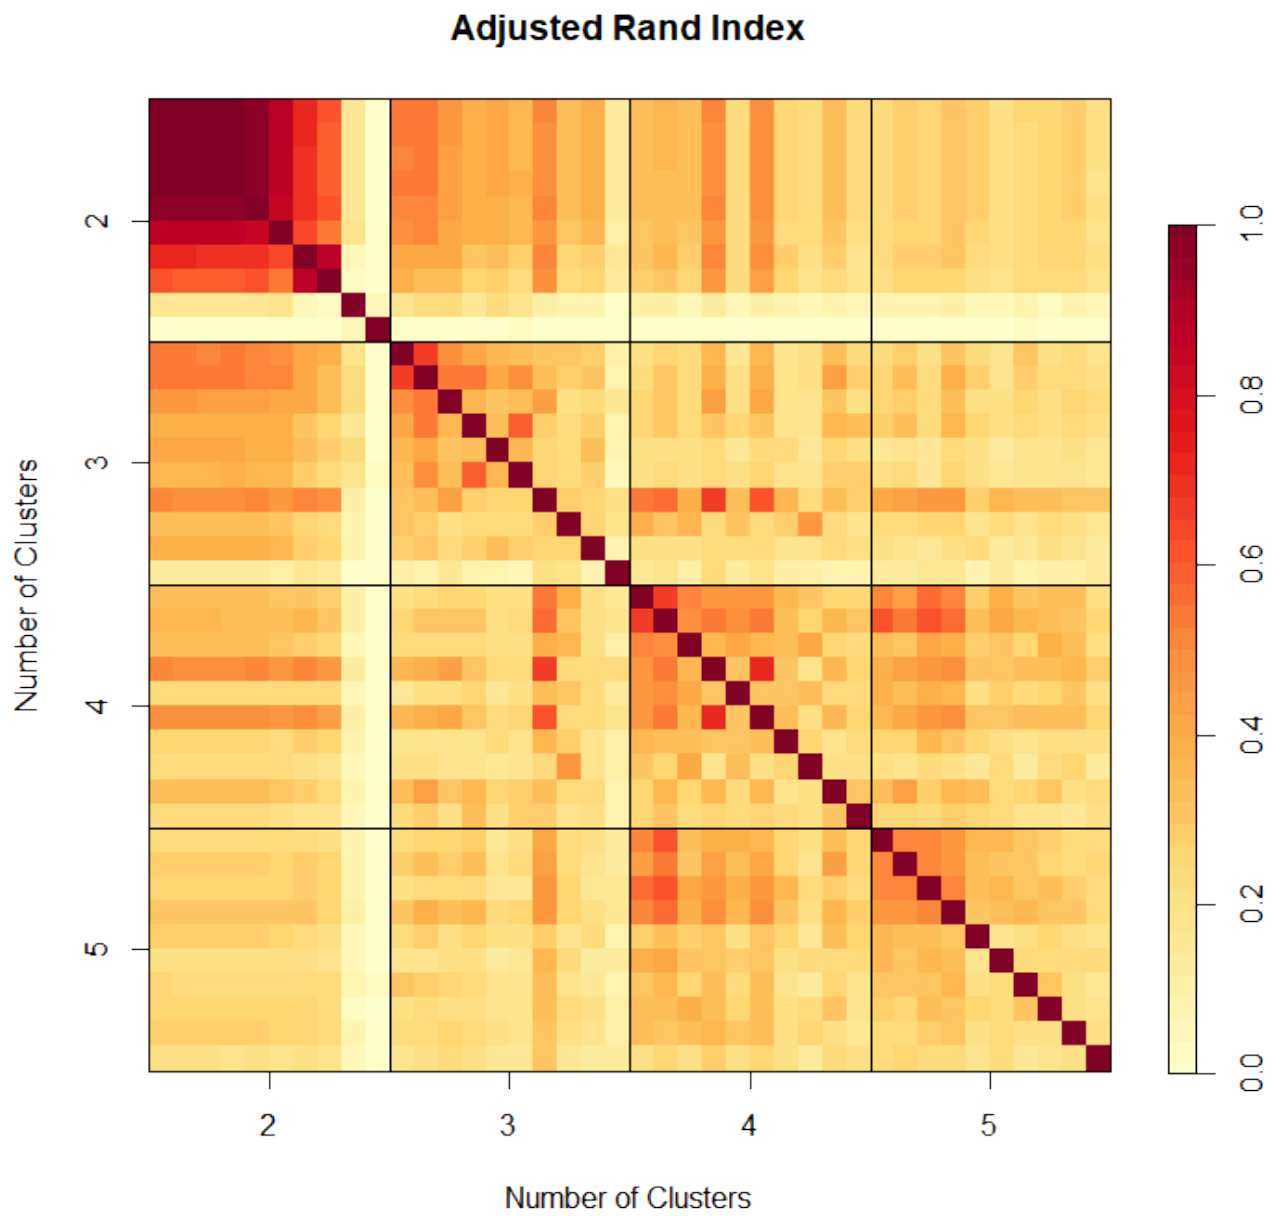

**eFigure 5.** Adjusted Rand index of longitudinal clustering of cervical length in twin pregnancies

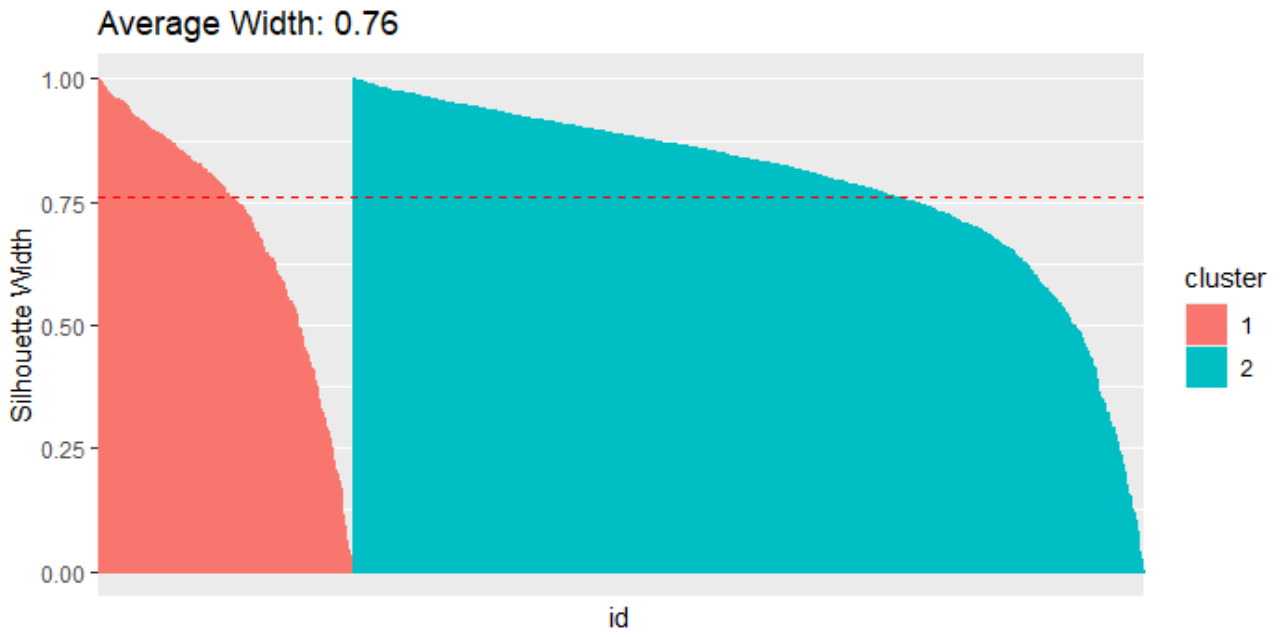

**eFigure 6.** Average silhouette value of longitudinal clustering of cervical length in twin pregnancies

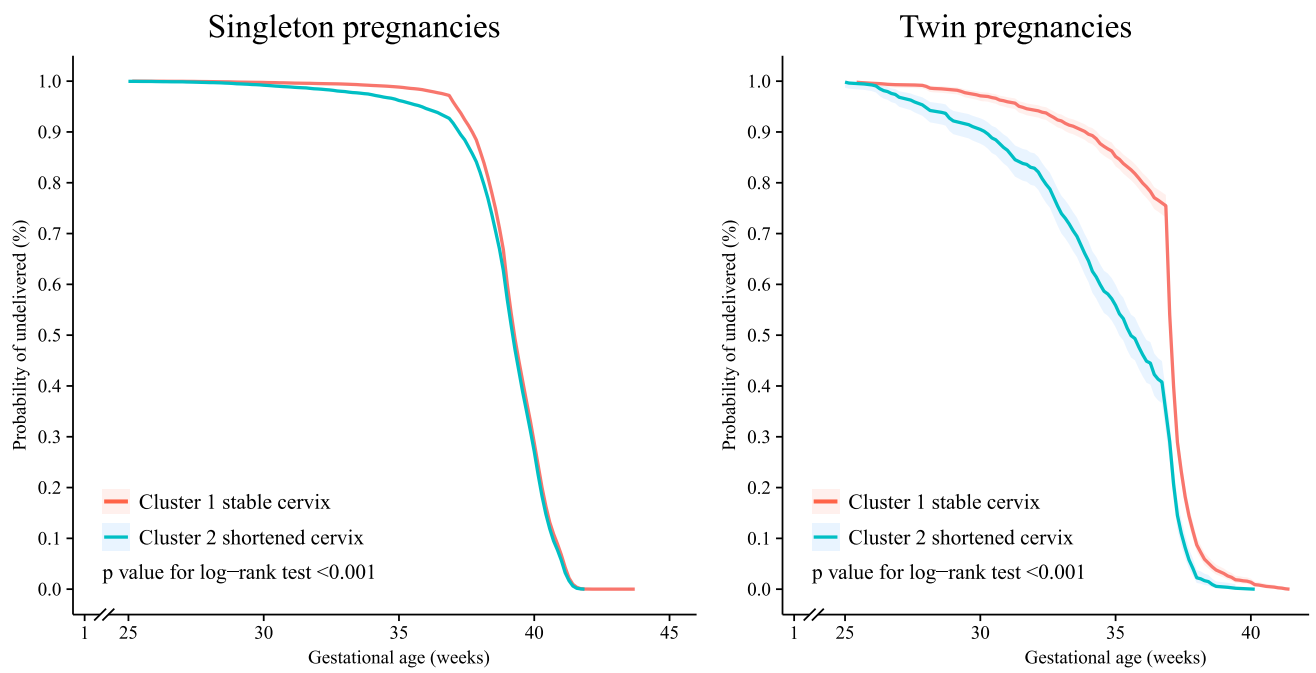

**eFigure 7.** Survival analysis of gestational age at delivery stratified by cervical length clusters in singleton and twin pregnancies

**Cluster 1 stable cervix of singleton pregnancies**

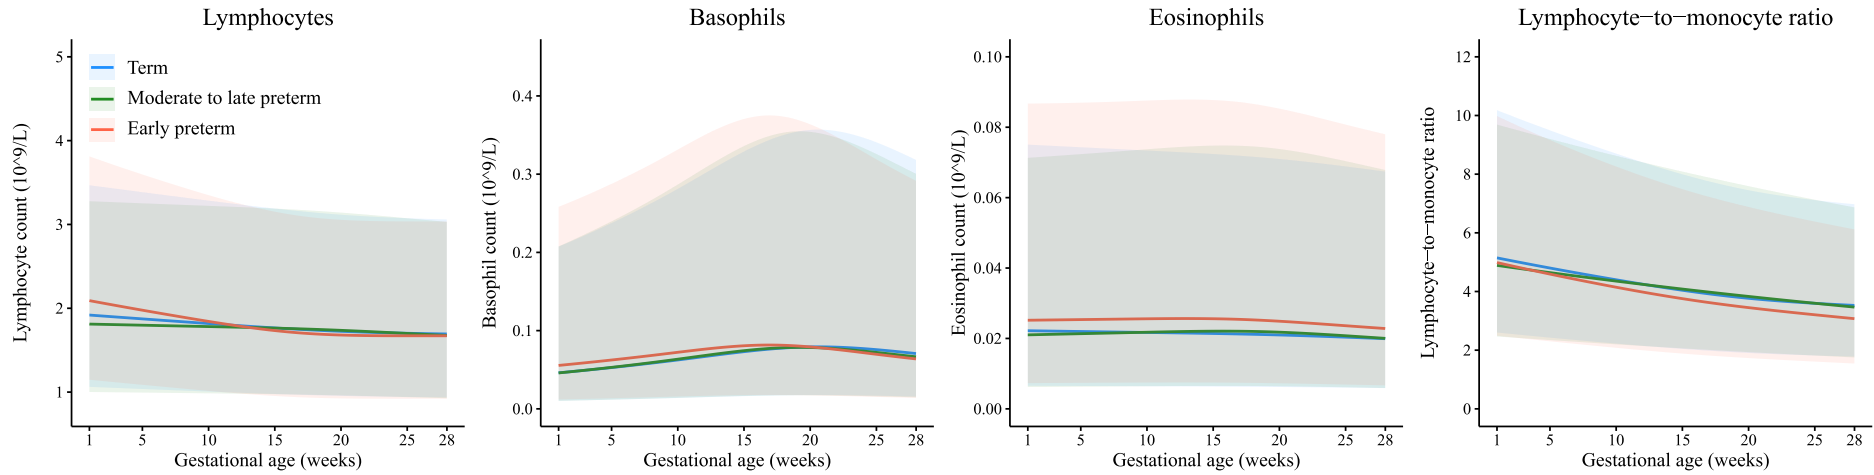

**Cluster 2 shortened cervix of singleton pregnancies**

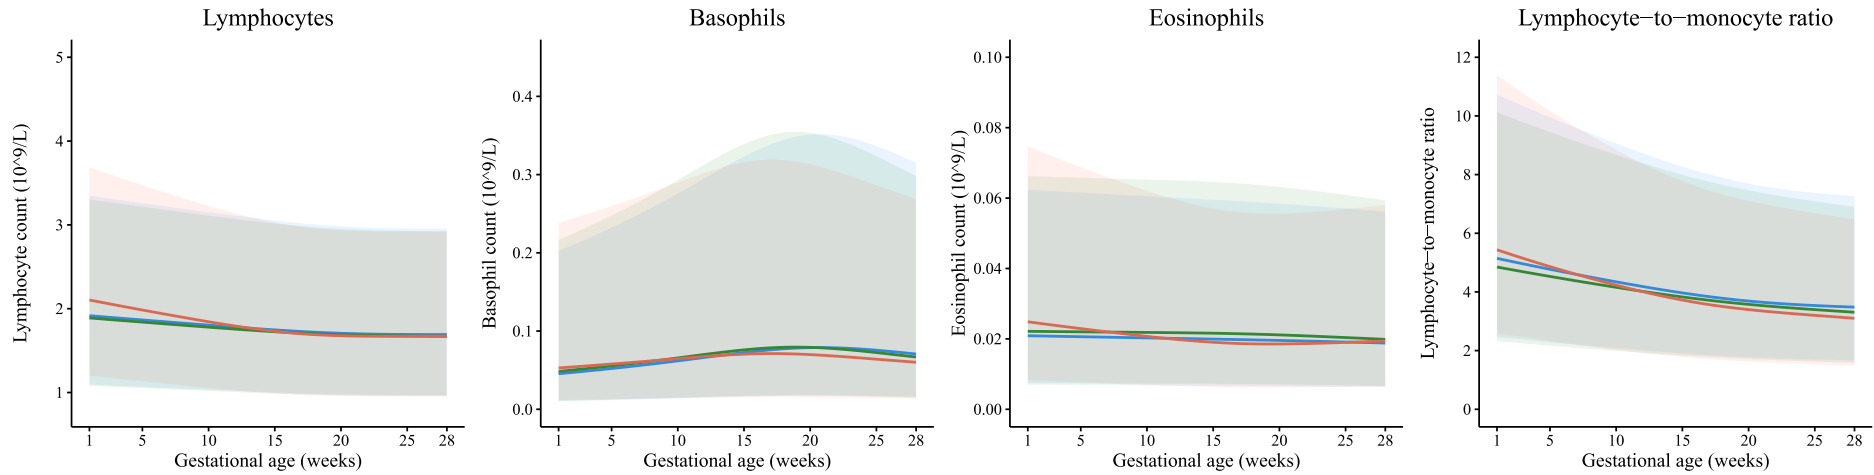

**eFigure 8.** Gestational age-specific trajectories for lymphocytes, basophils, eosinophils, lymphocyte-to-monocyte ratio stratified by cervical length clusters in singleton pregnancies.

**Cluster 1 stable cervix of twin pregnancies**

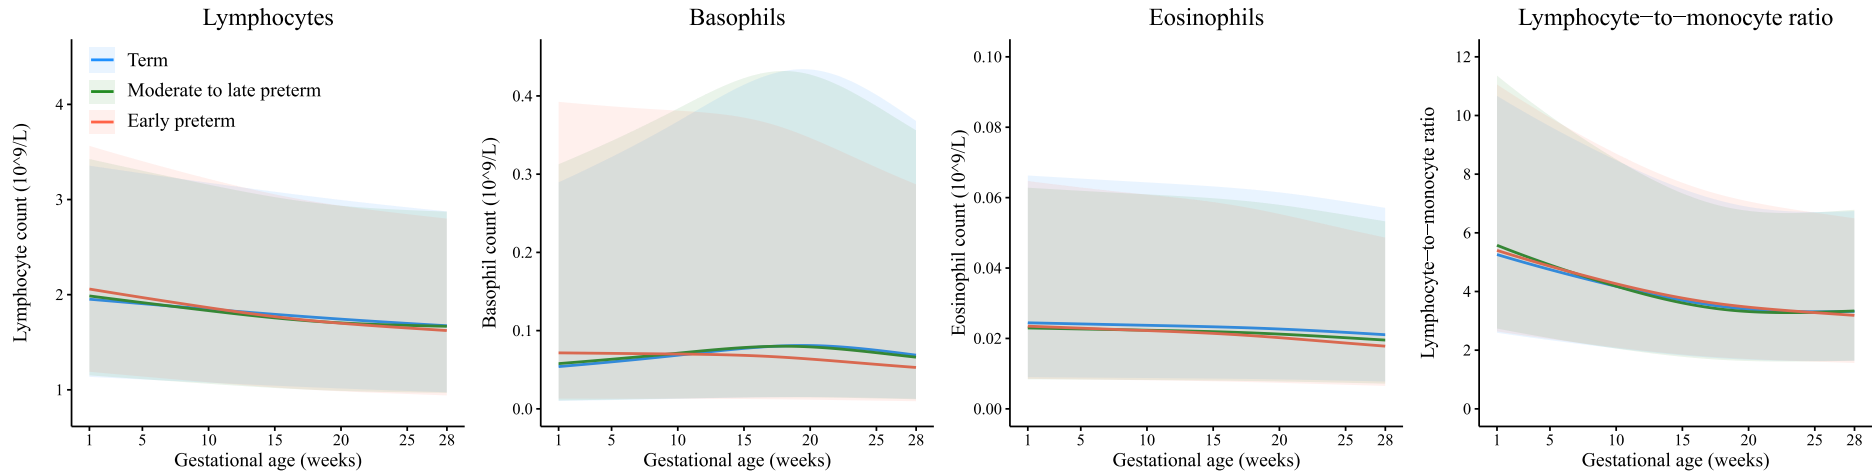

**Cluster 2 shortened cervix of twin pregnancies**

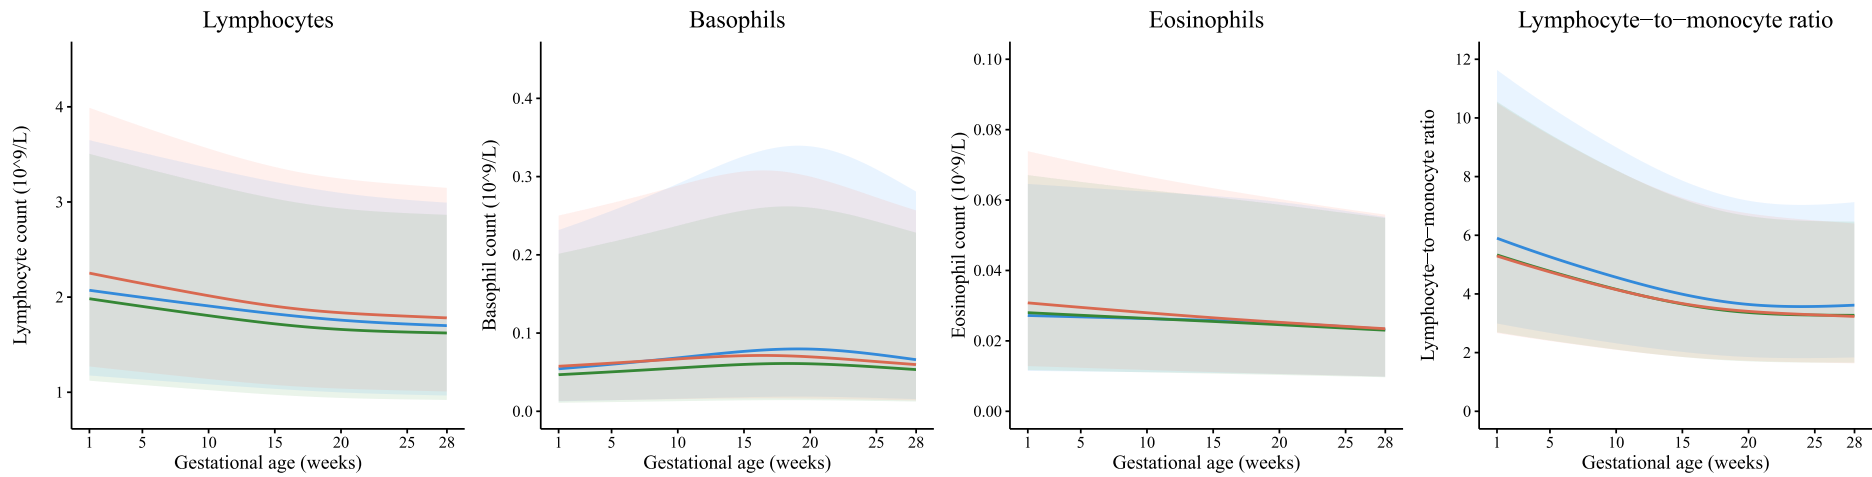

**eFigure 9.** Gestational age-specific trajectories for lymphocytes, basophils, eosinophils, lymphocyte-to-monocyte ratio stratified by cervical length clusters in twin pregnancies.

**Cluster 1 stable cervix of singleton pregnancies**

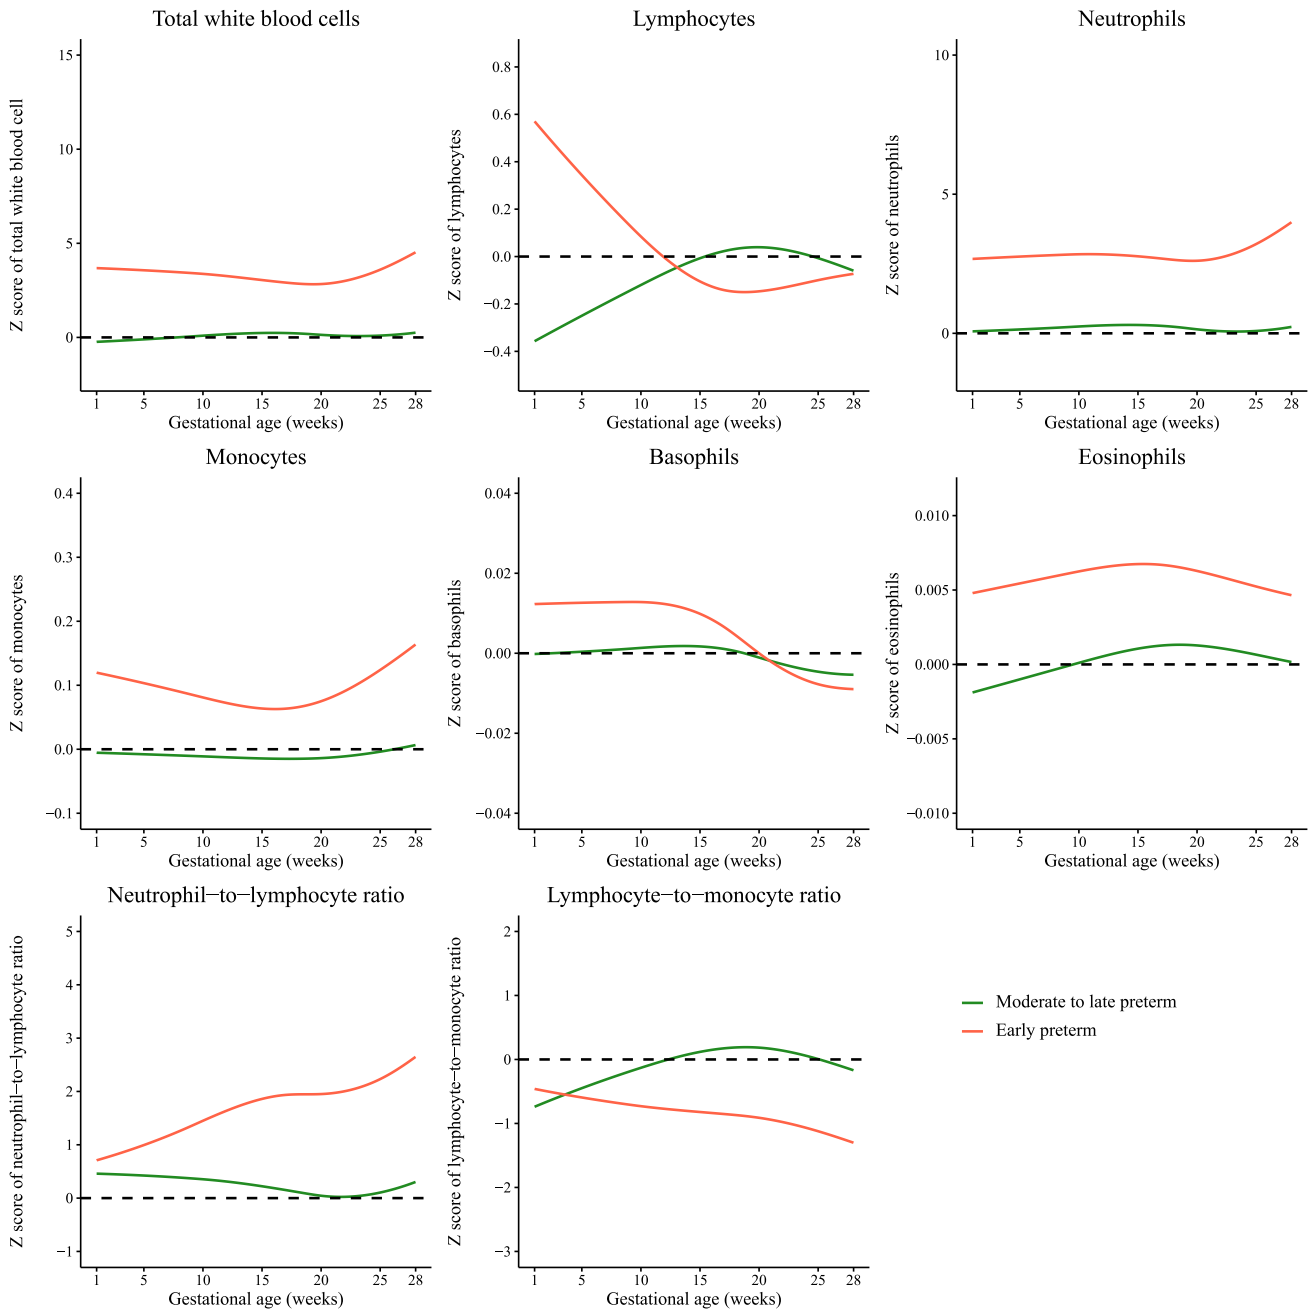

**eFigure 10.** Gestational age-specific Z-score for white blood cell indicators in singleton pregnancies with stable cervix with reference to term birth



**Cluster 2 shortened cervix of singleton pregnancies**

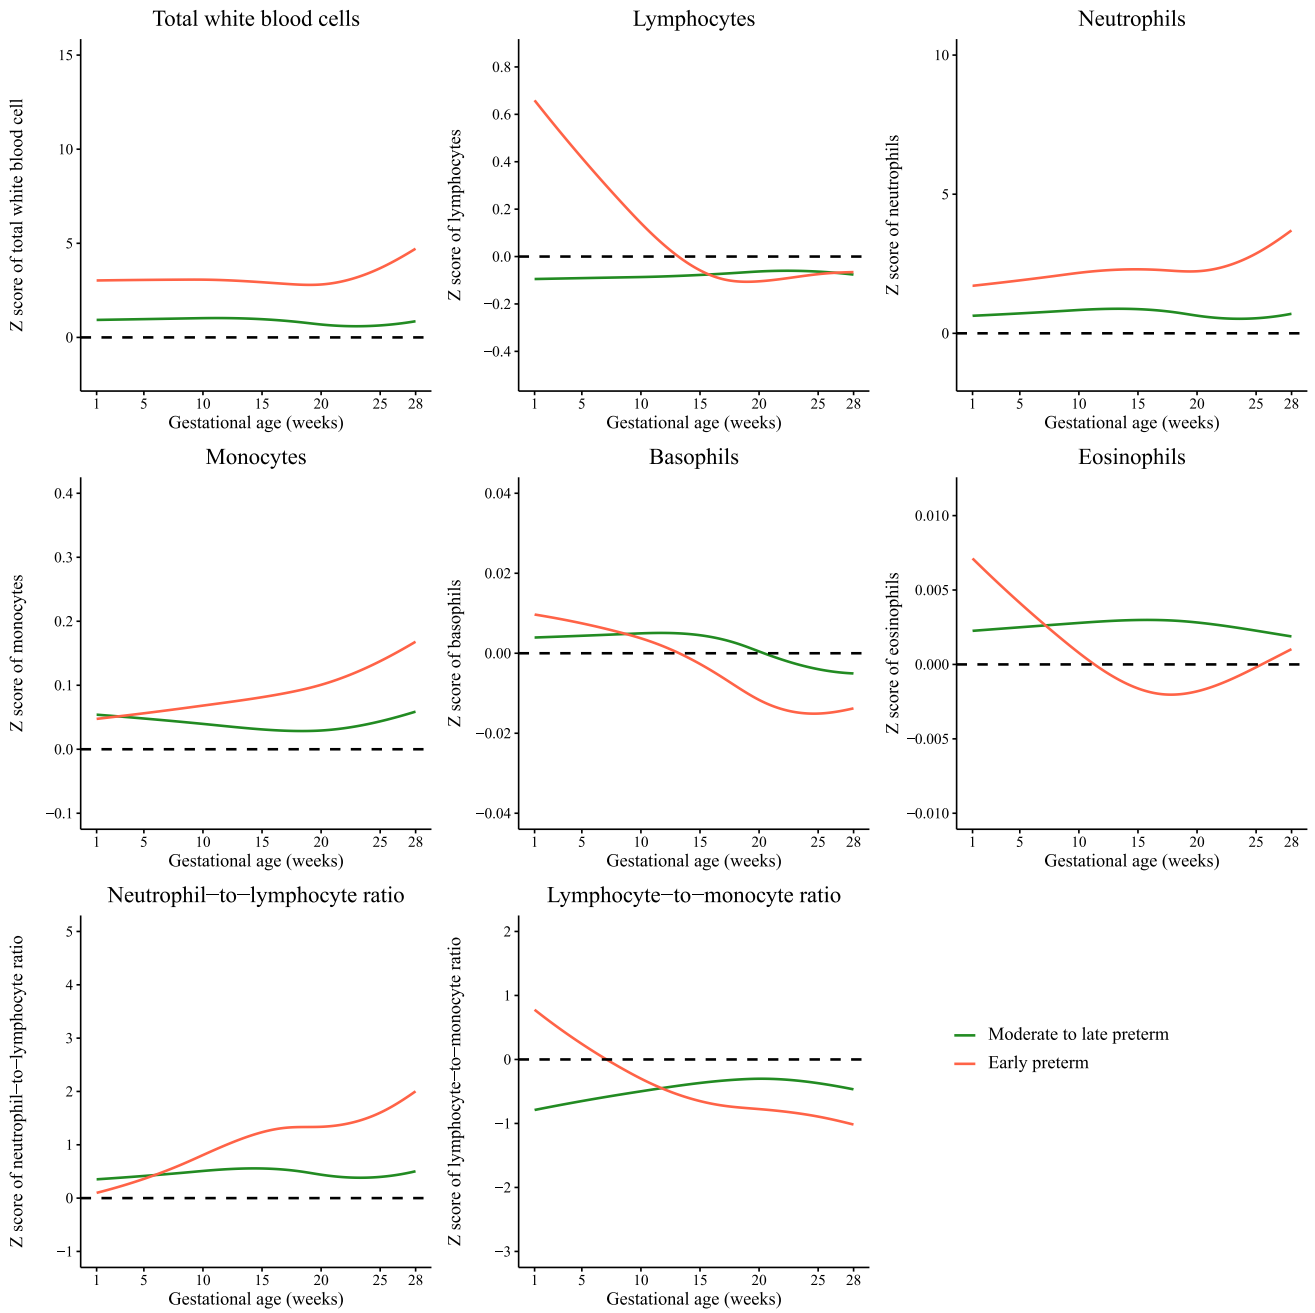

**eFigure 11.** Gestational age-specific Z-score for white blood cell indicators in singleton pregnancies with shortened cervix with reference to term birth

**Cluster 1 stable cervix of twin pregnancies**

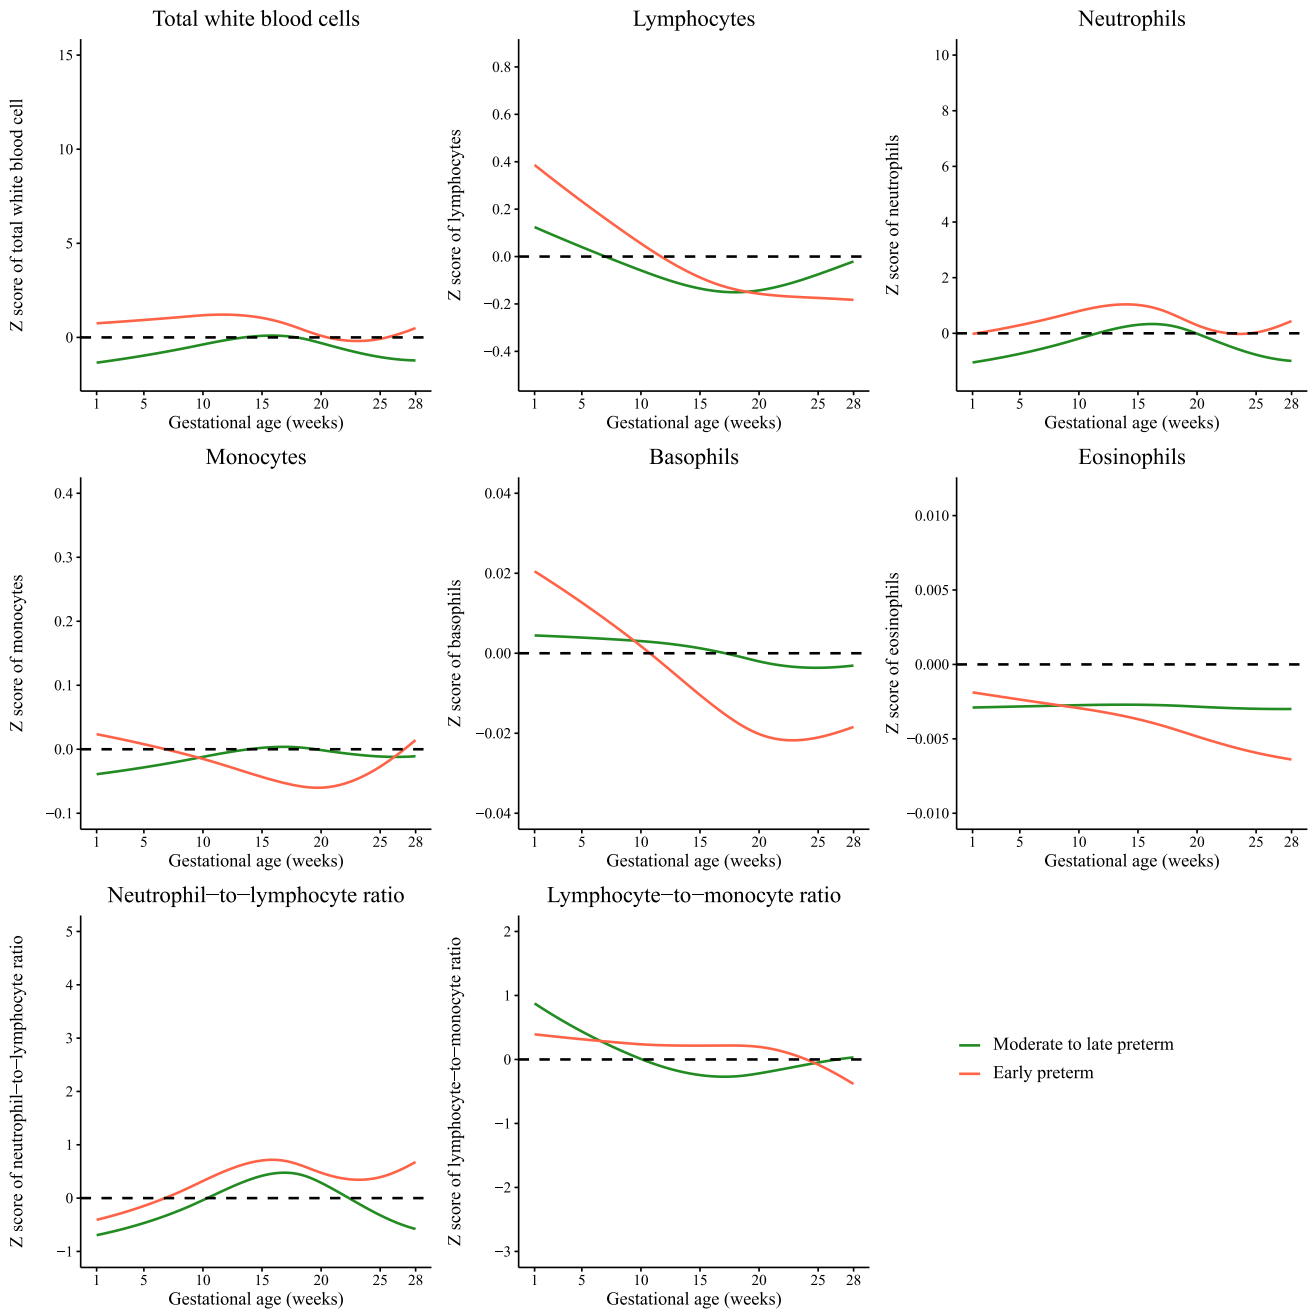

**eFigure 12.** Gestational age-specific Z-score for white blood cell indicators in twin pregnancies with stable cervix with reference to term birth

**Cluster 2 shortened cervix of twin pregnancies**

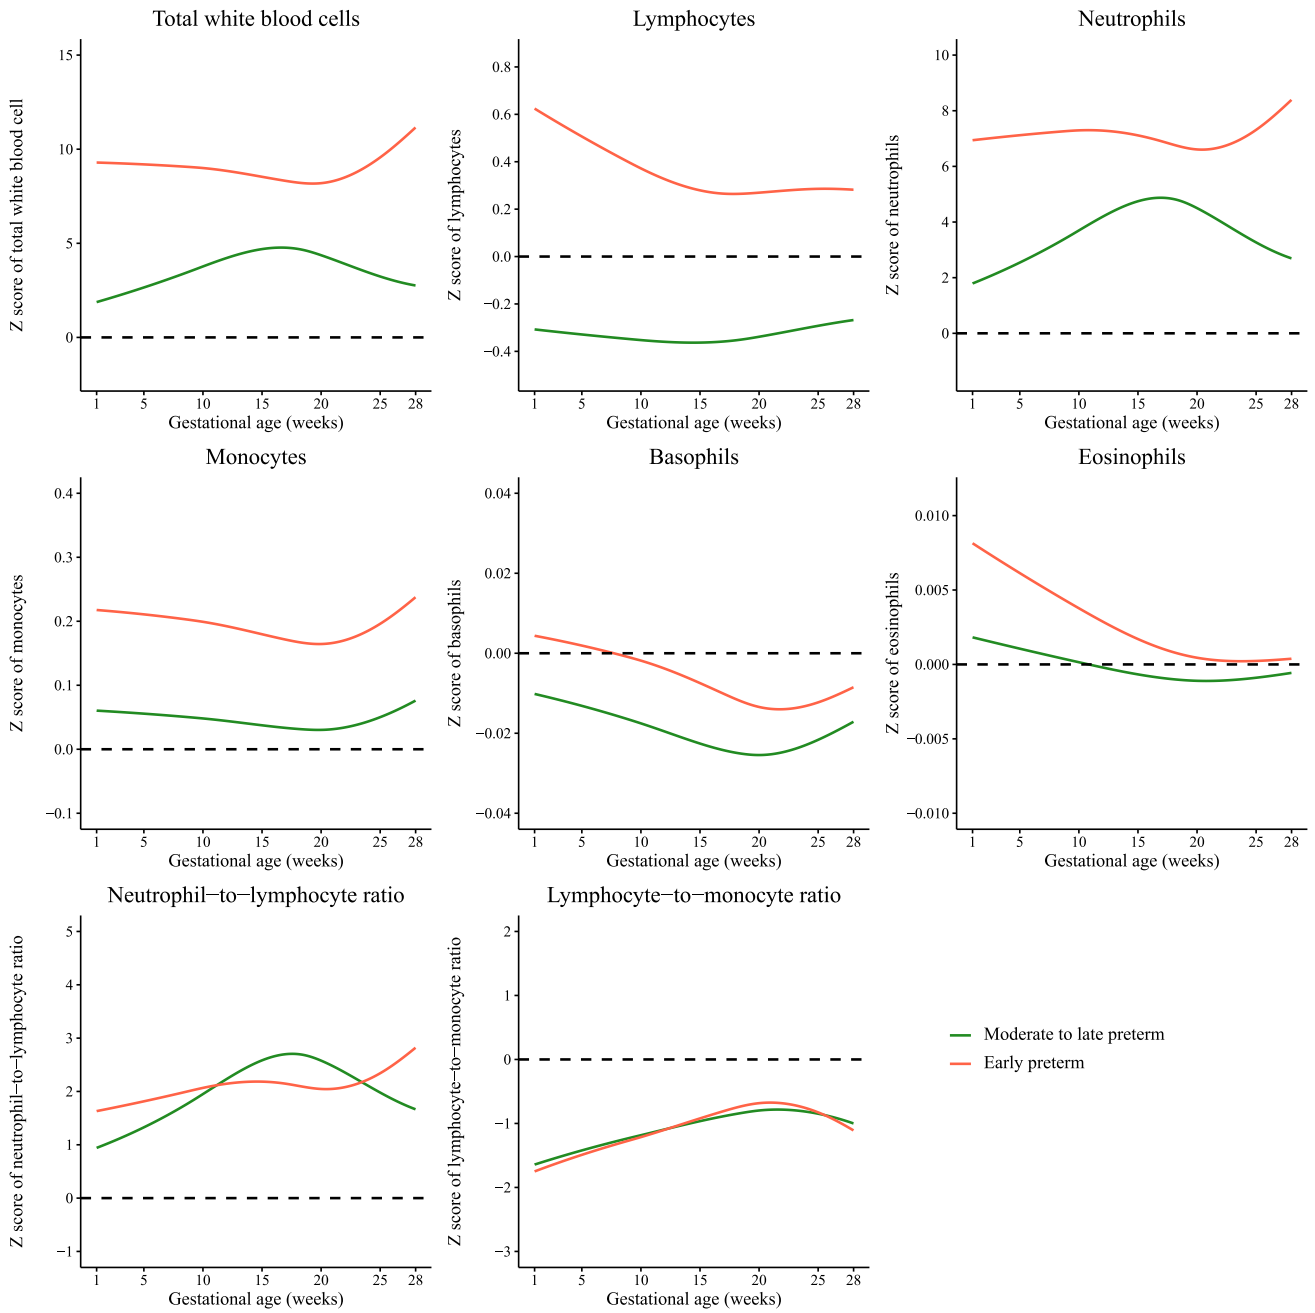

**eFigure 13.** Gestational age-specific Z-score for white blood cell indicators in twin pregnancies with shortened cervix with reference to term birth

**Cluster 1 stable cervix of singleton pregnancies**

**Cluster 2 shortened cervix of singleton pregnancies**

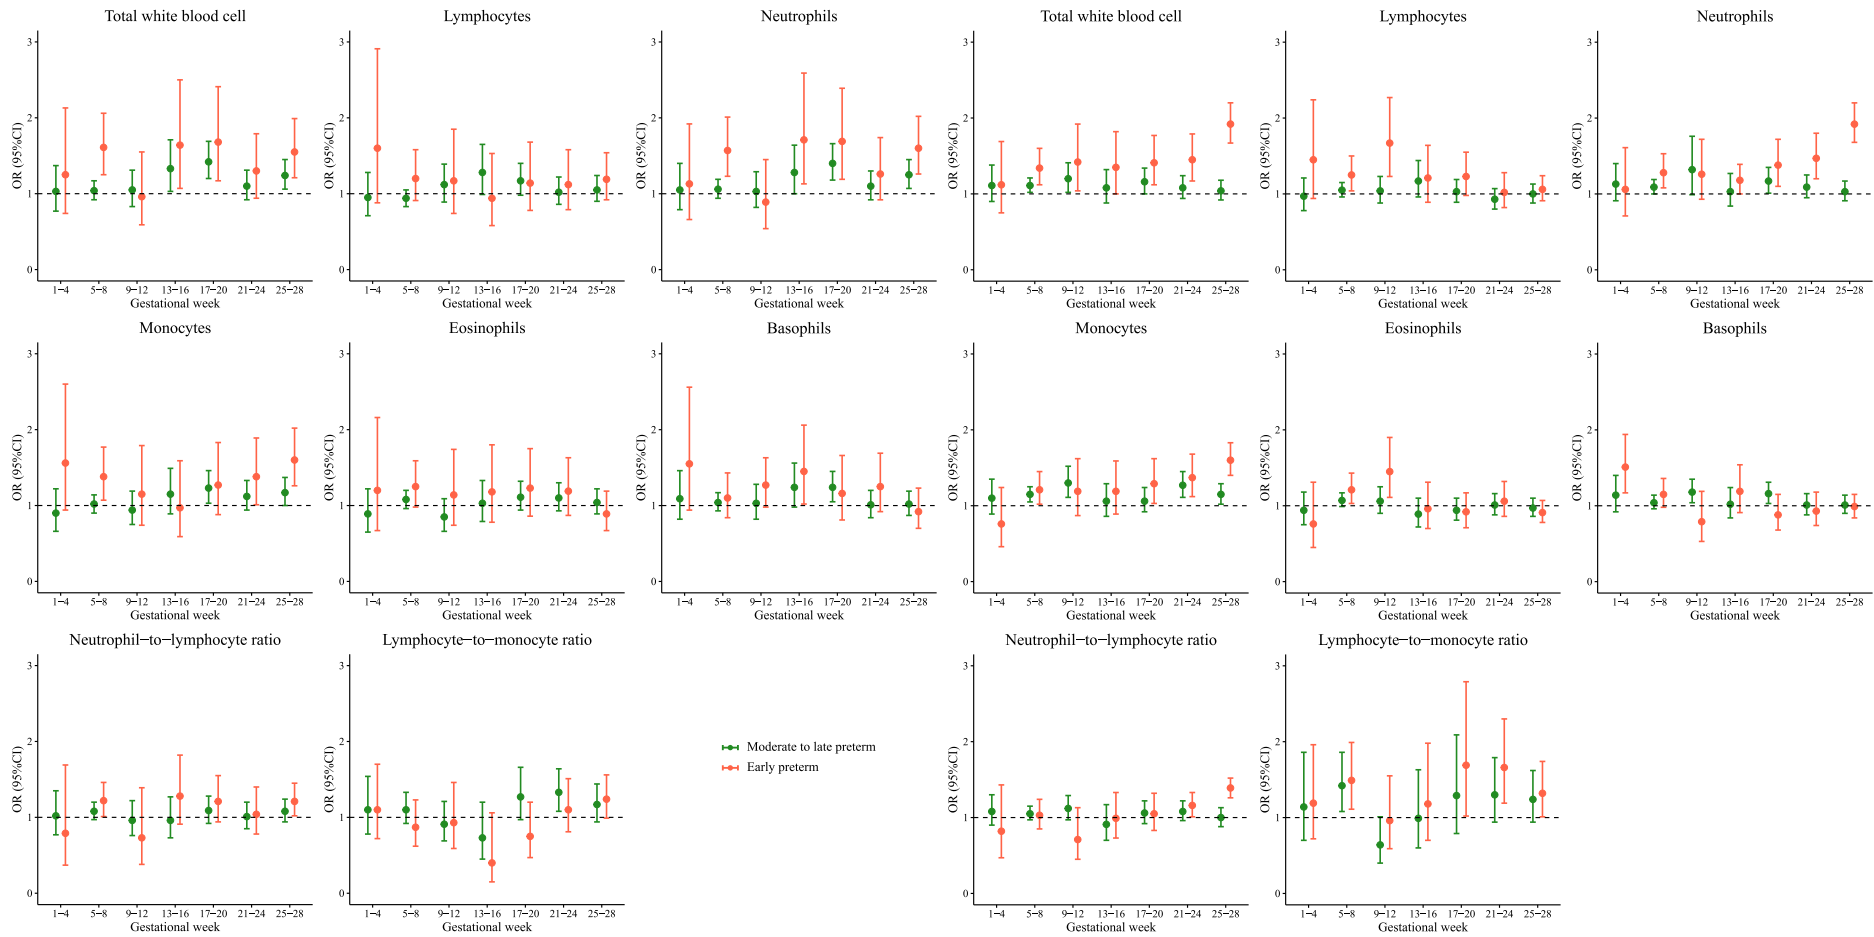

**eFigure 14.** The relationship between white blood cell indicators and spontaneous preterm birth stratified by cervical length clusters in singleton pregnancies.

**Cluster 1 stable cervix of twin pregnancies**

**Cluster 2 shortened cervix of twin pregnancies**

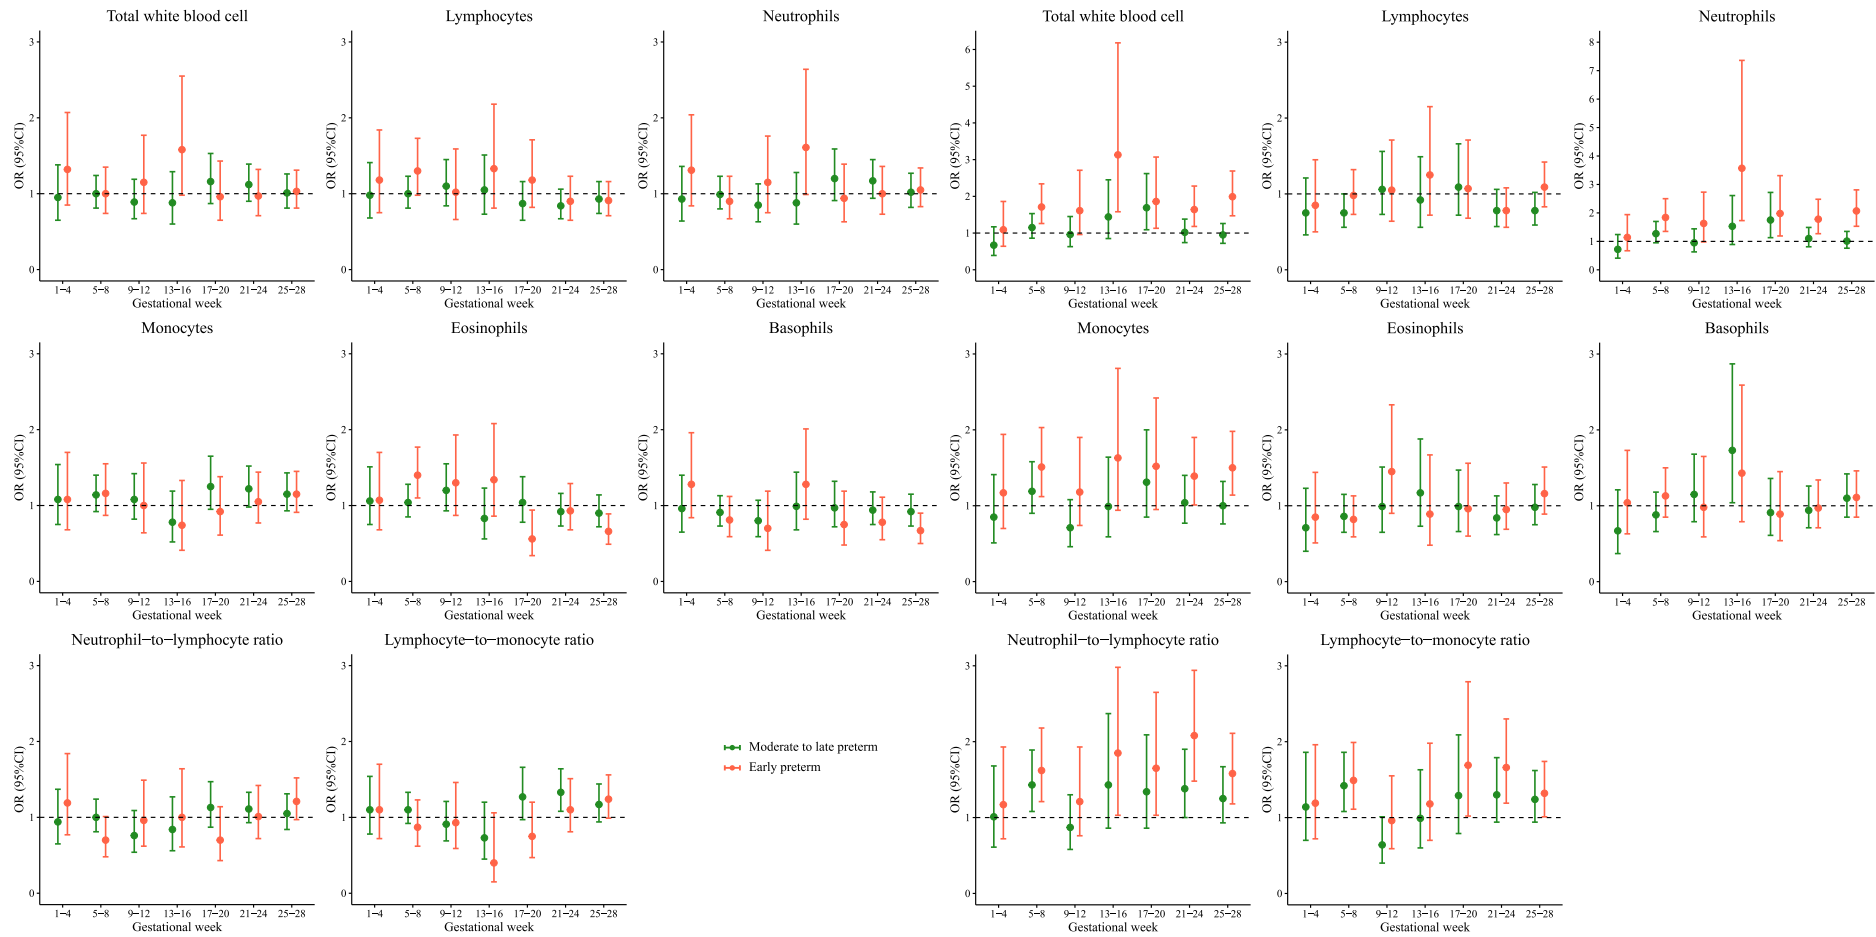

**eFigure 15.** The relationship between white blood cell indicators and spontaneous preterm birth stratified by cervical length clusters in twin pregnancies.

**eTable 5.** Likelihood ratio test for between-group comparison of white blood cell indicators by gestational week of delivery

| White blood cell tests indications | Cervical length trajectory patterns | P value of likelihood ratio test |                  |
|------------------------------------|-------------------------------------|----------------------------------|------------------|
|                                    |                                     | Singleton pregnancies            | Twin pregnancies |
| Total white blood cell             | Cluster 1 stable cervix             | <0.001                           | 0.204            |
|                                    | Cluster 2 shortened cervix          | <0.001                           | <0.001           |
| Lymphocytes                        | Cluster 1 stable cervix             | 0.285                            | 0.670            |
|                                    | Cluster 2 shortened cervix          | 0.158                            | 0.017            |
| Neutrophils                        | Cluster 1 stable cervix             | <0.001                           | 0.119            |
|                                    | Cluster 2 shortened cervix          | <0.001                           | <0.001           |
| Monocytes                          | Cluster 1 stable cervix             | 0.509                            | 0.502            |
|                                    | Cluster 2 shortened cervix          | 0.399                            | 0.009            |
| Eosinophils                        | Cluster 1 stable cervix             | 0.984                            | 0.360            |
|                                    | Cluster 2 shortened cervix          | 0.191                            | 0.540            |
| Basophils                          | Cluster 1 stable cervix             | 0.208                            | 0.091            |
|                                    | Cluster 2 shortened cervix          | 0.084                            | 0.616            |
| Neutrophil-to-lymphocyte ratio     | Cluster 1 stable cervix             | <0.001                           | 0.399            |
|                                    | Cluster 2 shortened cervix          | <0.001                           | <0.001           |
| Lymphocyte-to-monocyte ratio       | Cluster 1 stable cervix             | <0.001                           | 0.073            |
|                                    | Cluster 2 shortened cervix          | <0.001                           | <0.001           |

Note: To compare whether there are statistically significant differences in the white blood cell indicators trajectories curves among the early preterm birth, moderate to late preterm birth, and term birth, we fitted white blood cell indicators trajectories curves within each group using a random effects model with natural cubic splines and subsequently employed likelihood ratio tests to assess for statistical differences between the three models. The p-values presented in the above table correspond to the intergroup comparisons derived from the likelihood ratio tests.

**eTable 6.** Estimating the association between white blood cell indicators and spontaneous preterm birth using logistic regression with reference to term birth

| White blood cell tests indications | Gestational weeks interval | Spontaneous preterm birth  | Cervical length trajectory patterns | Singleton pregnancies   |                 |                         | Twin pregnancies        |                 |                   |
|------------------------------------|----------------------------|----------------------------|-------------------------------------|-------------------------|-----------------|-------------------------|-------------------------|-----------------|-------------------|
|                                    |                            |                            |                                     | OR (95%CI)              | P for OR        | P for interaction       | OR (95%CI)              | P for OR        | P for interaction |
| Total white blood cells            | 1~4                        | Moderate to late preterm   | Cluster 1 stable cervix             | 1.03 (0.77~1.37)        | 0.85            | 0.38                    | 0.95 (0.65~1.38)        | 0.77            | 0.17              |
|                                    |                            |                            | Cluster 2 shortened cervix          | 1.11 (0.90~1.38)        | 0.34            |                         | 0.67 (0.39~1.17)        | 0.16            |                   |
|                                    |                            | Early preterm              | Cluster 1 stable cervix             | 1.25 (0.74~2.13)        | 0.40            | 0.16                    | 1.32 (0.85~2.07)        | 0.22            | 0.28              |
|                                    |                            |                            | Cluster 2 shortened cervix          | 1.12 (0.75~1.69)        | 0.57            |                         | 1.09 (0.64~1.86)        | 0.74            |                   |
|                                    | 5~8                        | Moderate to late preterm   | Cluster 1 stable cervix             | 1.04 (0.92~1.17)        | 0.54            | <0.01                   | 1.00 (0.81~1.24)        | 0.99            | 0.55              |
|                                    |                            |                            | Cluster 2 shortened cervix          | <b>1.11 (1.02~1.21)</b> | <b>0.02</b>     |                         | 1.15 (0.86~1.53)        | 0.36            |                   |
|                                    |                            | Early preterm              | Cluster 1 stable cervix             | <b>1.61 (1.25~2.06)</b> | <b>&lt;0.01</b> | <0.01                   | 1.00 (0.74~1.35)        | 0.99            | <0.01             |
|                                    |                            |                            | Cluster 2 shortened cervix          | <b>1.34 (1.12~1.60)</b> | <b>&lt;0.01</b> |                         | <b>1.71 (1.26~2.34)</b> | <b>&lt;0.01</b> |                   |
|                                    | 9~12                       | Moderate to late preterm   | Cluster 1 stable cervix             | 1.05 (0.83~1.31)        | 0.70            | <0.01                   | 0.89 (0.67~1.19)        | 0.44            | 0.85              |
|                                    |                            |                            | Cluster 2 shortened cervix          | <b>1.20 (1.02~1.41)</b> | <b>0.03</b>     |                         | 0.96 (0.63~1.45)        | 0.85            |                   |
|                                    |                            | Early preterm              | Cluster 1 stable cervix             | 0.96 (0.59~1.55)        | 0.85            | 0.02                    | 1.15 (0.74~1.77)        | 0.53            | 0.33              |
|                                    |                            |                            | Cluster 2 shortened cervix          | <b>1.42 (1.04~1.92)</b> | <b>0.03</b>     |                         | 1.61 (0.96~2.71)        | 0.07            |                   |
|                                    | 13~16                      | Moderate to late preterm   | Cluster 1 stable cervix             | <b>1.33 (1.03~1.71)</b> | <b>0.03</b>     | 0.11                    | 0.88 (0.60~1.29)        | 0.50            | 0.71              |
|                                    |                            |                            | Cluster 2 shortened cervix          | 1.08 (0.88~1.32)        | 0.48            |                         | 1.44 (0.85~2.45)        | 0.18            |                   |
|                                    |                            | Early preterm              | Cluster 1 stable cervix             | <b>1.64 (1.07~2.50)</b> | <b>0.02</b>     | <0.01                   | 1.58 (0.98~2.55)        | 0.06            | <0.01             |
|                                    |                            |                            | Cluster 2 shortened cervix          | <b>1.35 (1.00~1.82)</b> | <b>0.05</b>     |                         | <b>3.13 (1.58~6.18)</b> | <b>&lt;0.01</b> |                   |
|                                    | 17~20                      | Moderate to late preterm   | Cluster 1 stable cervix             | <b>1.42 (1.20~1.69)</b> | <b>&lt;0.01</b> | <0.01                   | 1.16 (0.87~1.53)        | 0.31            | <0.01             |
|                                    |                            |                            | Cluster 2 shortened cervix          | <b>1.16 (1.00~1.34)</b> | <b>0.05</b>     |                         | <b>1.69 (1.09~2.62)</b> | <b>0.02</b>     |                   |
|                                    |                            | Early preterm              | Cluster 1 stable cervix             | <b>1.68 (1.17~2.41)</b> | <b>&lt;0.01</b> | <0.01                   | 0.96 (0.65~1.43)        | 0.85            | 0.03              |
|                                    |                            |                            | Cluster 2 shortened cervix          | <b>1.41 (1.12~1.77)</b> | <b>&lt;0.01</b> |                         | <b>1.86 (1.13~3.07)</b> | <b>0.02</b>     |                   |
|                                    | 21~24                      | Moderate to late preterm   | Cluster 1 stable cervix             | 1.10 (0.92~1.31)        | 0.28            | 0.20                    | 1.12 (0.90~1.39)        | 0.31            | 0.42              |
|                                    |                            |                            | Cluster 2 shortened cervix          | 1.08 (0.94~1.24)        | 0.31            |                         | 1.02 (0.74~1.38)        | 0.92            |                   |
|                                    |                            | Early preterm              | Cluster 1 stable cervix             | 1.30 (0.94~1.79)        | 0.11            | <0.01                   | 0.97 (0.71~1.32)        | 0.83            | <0.01             |
|                                    |                            |                            | Cluster 2 shortened cervix          | <b>1.45 (1.17~1.79)</b> | <b>&lt;0.01</b> |                         | <b>1.64 (1.18~2.28)</b> | <b>&lt;0.01</b> |                   |
| 25~28                              | Moderate to late preterm   | Cluster 1 stable cervix    | <b>1.24 (1.06~1.45)</b>             | <b>&lt;0.01</b>         | 0.22            | 1.01 (0.81~1.26)        | 0.93                    | 0.52            |                   |
|                                    |                            | Cluster 2 shortened cervix | 1.04 (0.92~1.18)                    | 0.54                    |                 | 0.95 (0.72~1.26)        | 0.74                    |                 |                   |
|                                    | Early preterm              | Cluster 1 stable cervix    | <b>1.55 (1.21~1.99)</b>             | <b>&lt;0.01</b>         | <0.01           | 1.03 (0.81~1.31)        | 0.79                    | <0.01           |                   |
|                                    |                            | Cluster 2 shortened cervix | <b>1.92 (1.67~2.20)</b>             | <b>&lt;0.01</b>         |                 | <b>1.99 (1.47~2.69)</b> | <b>&lt;0.01</b>         |                 |                   |
| Lymphocytes                        | 1~4                        | Moderate to late preterm   | Cluster 1 stable cervix             | 0.95 (0.71~1.28)        | 0.75            | 0.70                    | 0.98 (0.68~1.41)        | 0.92            | 0.29              |
|                                    |                            |                            | Cluster 2 shortened cervix          | 0.97 (0.78~1.21)        | 0.81            |                         | 0.75 (0.46~1.21)        | 0.23            |                   |
|                                    |                            | Early preterm              | Cluster 1 stable cervix             | 1.60 (0.88~2.91)        | 0.13            | 0.81                    | 1.18 (0.75~1.84)        | 0.47            | 0.86              |
|                                    |                            |                            | Cluster 2 shortened cervix          | 1.45 (0.94~2.24)        | 0.09            |                         | 0.85 (0.50~1.45)        | 0.55            |                   |
|                                    | 5~8                        | Moderate to late preterm   | Cluster 1 stable cervix             | 0.94 (0.83~1.05)        | 0.27            | 0.40                    | 1.00 (0.81~1.23)        | 0.97            | 0.08              |
|                                    |                            |                            | Cluster 2 shortened cervix          | 1.05 (0.96~1.15)        | 0.25            |                         | 0.75 (0.56~1.00)        | 0.05            |                   |
|                                    |                            | Early preterm              | Cluster 1 stable cervix             | 1.20 (0.91~1.58)        | 0.19            | <0.01                   | 1.30 (0.98~1.73)        | 0.07            | 0.37              |

|             |               |                          |                            |                         |                 |                  |                         |                 |       |
|-------------|---------------|--------------------------|----------------------------|-------------------------|-----------------|------------------|-------------------------|-----------------|-------|
|             |               |                          | Cluster 2 shortened cervix | <b>1.25 (1.04~1.50)</b> | <b>0.02</b>     |                  | 0.98 (0.73~1.32)        | 0.89            |       |
|             | 9~12          | Moderate to late preterm | Cluster 1 stable cervix    | 1.12 (0.89~1.39)        | 0.34            | 0.30             | 1.10 (0.84~1.45)        | 0.48            | 0.44  |
|             |               |                          | Cluster 2 shortened cervix | 1.04 (0.88~1.23)        | 0.63            |                  | 1.06 (0.73~1.56)        | 0.75            |       |
|             | 9~12          | Early preterm            | Cluster 1 stable cervix    | 1.17 (0.74~1.85)        | 0.51            | <0.01            | 1.02 (0.66~1.59)        | 0.92            | 0.72  |
|             |               |                          | Cluster 2 shortened cervix | <b>1.67 (1.23~2.27)</b> | <b>&lt;0.01</b> |                  | 1.05 (0.64~1.71)        | 0.86            |       |
|             | 13~16         | Moderate to late preterm | Cluster 1 stable cervix    | 1.28 (0.99~1.65)        | 0.06            | 0.71             | 1.05 (0.73~1.51)        | 0.81            | 0.75  |
|             |               |                          | Cluster 2 shortened cervix | 1.17 (0.96~1.44)        | 0.12            |                  | 0.92 (0.56~1.49)        | 0.73            |       |
|             | 13~16         | Early preterm            | Cluster 1 stable cervix    | 0.94 (0.58~1.53)        | 0.81            | 0.29             | 1.33 (0.81~2.18)        | 0.25            | 0.28  |
|             |               |                          | Cluster 2 shortened cervix | 1.21 (0.89~1.64)        | 0.23            |                  | 1.25 (0.72~2.15)        | 0.43            |       |
|             | 17~20         | Moderate to late preterm | Cluster 1 stable cervix    | 1.17 (0.98~1.40)        | 0.09            | 0.13             | 0.87 (0.65~1.16)        | 0.35            | 0.85  |
|             |               |                          | Cluster 2 shortened cervix | 1.03 (0.89~1.19)        | 0.70            |                  | 1.09 (0.72~1.66)        | 0.67            |       |
|             | 17~20         | Early preterm            | Cluster 1 stable cervix    | 1.14 (0.78~1.68)        | 0.50            | 0.66             | 1.18 (0.82~1.71)        | 0.38            | 0.60  |
|             |               |                          | Cluster 2 shortened cervix | 1.23 (0.98~1.55)        | 0.07            |                  | 1.07 (0.68~1.71)        | 0.76            |       |
|             | 21~24         | Moderate to late preterm | Cluster 1 stable cervix    | 1.02 (0.86~1.22)        | 0.79            | 0.30             | 0.84 (0.67~1.06)        | 0.15            | 0.11  |
|             |               |                          | Cluster 2 shortened cervix | 0.93 (0.80~1.07)        | 0.32            |                  | 0.78 (0.57~1.06)        | 0.11            |       |
|             | 21~24         | Early preterm            | Cluster 1 stable cervix    | 1.12 (0.79~1.58)        | 0.52            | 0.87             | 0.90 (0.65~1.23)        | 0.50            | 0.08  |
|             |               |                          | Cluster 2 shortened cervix | 1.02 (0.82~1.28)        | 0.86            |                  | 0.78 (0.56~1.08)        | 0.13            |       |
|             | 25~28         | Moderate to late preterm | Cluster 1 stable cervix    | 1.05 (0.90~1.24)        | 0.51            | 0.92             | 0.93 (0.74~1.16)        | 0.52            | 0.05  |
|             |               |                          | Cluster 2 shortened cervix | 1.00 (0.88~1.13)        | 0.95            |                  | 0.78 (0.59~1.02)        | 0.07            |       |
|             | 25~28         | Early preterm            | Cluster 1 stable cervix    | 1.19 (0.92~1.54)        | 0.20            | 0.34             | 0.91 (0.71~1.16)        | 0.43            | 0.57  |
|             |               |                          | Cluster 2 shortened cervix | 1.06 (0.91~1.24)        | 0.43            |                  | 1.09 (0.83~1.42)        | 0.53            |       |
| Neutrophils | 1~4           | Moderate to late preterm | Cluster 1 stable cervix    | 1.05 (0.79~1.40)        | 0.73            | 0.27             | 0.93 (0.64~1.36)        | 0.72            | 0.21  |
|             |               |                          | Cluster 2 shortened cervix | 1.13 (0.91~1.40)        | 0.25            |                  | 0.72 (0.41~1.24)        | 0.23            |       |
|             | 1~4           | Early preterm            | Cluster 1 stable cervix    | 1.13 (0.66~1.92)        | 0.66            | 0.32             | 1.31 (0.84~2.04)        | 0.24            | 0.24  |
|             |               |                          | Cluster 2 shortened cervix | 1.06 (0.71~1.61)        | 0.77            |                  | 1.14 (0.67~1.94)        | 0.62            |       |
|             | 5~8           | Moderate to late preterm | Cluster 1 stable cervix    | 1.06 (0.94~1.19)        | 0.34            | <0.01            | 0.99 (0.80~1.23)        | 0.94            | 0.28  |
|             |               |                          | Cluster 2 shortened cervix | <b>1.09 (1.00~1.19)</b> | <b>0.05</b>     |                  | 1.27 (0.95~1.70)        | 0.11            |       |
|             | 5~8           | Early preterm            | Cluster 1 stable cervix    | <b>1.57 (1.23~2.01)</b> | <b>&lt;0.01</b> | <0.01            | 0.90 (0.67~1.23)        | 0.52            | <0.01 |
|             |               |                          | Cluster 2 shortened cervix | <b>1.28 (1.08~1.53)</b> | <b>&lt;0.01</b> |                  | <b>1.84 (1.35~2.50)</b> | <b>&lt;0.01</b> |       |
|             | 9~12          | Moderate to late preterm | Cluster 1 stable cervix    | 1.03 (0.82~1.29)        | 0.80            | 0.26             | 0.85 (0.63~1.13)        | 0.26            | 0.98  |
|             |               |                          | Cluster 2 shortened cervix | <b>1.18 (1.00~1.39)</b> | <b>0.04</b>     |                  | 0.95 (0.63~1.44)        | 0.83            |       |
|             | 9~12          | Early preterm            | Cluster 1 stable cervix    | 0.89 (0.54~1.45)        | 0.63            | 0.16             | 1.15 (0.75~1.76)        | 0.53            | 0.30  |
|             |               |                          | Cluster 2 shortened cervix | 1.26 (0.93~1.72)        | 0.14            |                  | 1.63 (0.98~2.73)        | 0.06            |       |
|             | 13~16         | Moderate to late preterm | Cluster 1 stable cervix    | <b>1.28 (1.00~1.64)</b> | <b>0.05</b>     | 0.27             | 0.88 (0.60~1.28)        | 0.50            | 0.67  |
|             |               |                          | Cluster 2 shortened cervix | 1.03 (0.84~1.27)        | 0.75            |                  | 1.53 (0.89~2.61)        | 0.12            |       |
|             | 13~16         | Early preterm            | Cluster 1 stable cervix    | <b>1.71 (1.13~2.59)</b> | <b>0.01</b>     | <0.01            | 1.61 (0.99~2.64)        | 0.06            | <0.01 |
|             |               |                          | Cluster 2 shortened cervix | <b>1.32 (0.99~1.76)</b> | <b>0.06</b>     |                  | <b>3.57 (1.73~7.36)</b> | <b>&lt;0.01</b> |       |
|             | 17~20         | Moderate to late preterm | Cluster 1 stable cervix    | <b>1.40 (1.18~1.66)</b> | <b>&lt;0.01</b> | <0.01            | 1.20 (0.91~1.59)        | 0.20            | <0.01 |
|             |               |                          | Cluster 2 shortened cervix | <b>1.17 (1.01~1.35)</b> | <b>0.04</b>     |                  | <b>1.75 (1.13~2.72)</b> | <b>0.01</b>     |       |
| 17~20       | Early preterm | Cluster 1 stable cervix  | <b>1.69 (1.19~2.39)</b>    | <b>&lt;0.01</b>         | <0.01           | 0.94 (0.63~1.39) | 0.75                    | 0.02            |       |



|             |                          |                            |                            |                         |                 |                         |                         |                 |       |
|-------------|--------------------------|----------------------------|----------------------------|-------------------------|-----------------|-------------------------|-------------------------|-----------------|-------|
|             |                          |                            | Cluster 2 shortened cervix | <b>1.38 (1.10~1.72)</b> | <b>&lt;0.01</b> |                         | <b>1.98 (1.19~3.31)</b> | <b>&lt;0.01</b> |       |
|             | 21~24                    | Moderate to late preterm   | Cluster 1 stable cervix    | 1.10 (0.92~1.30)        | 0.30            | 0.15                    | 1.17 (0.94~1.45)        | 0.16            | 0.19  |
|             |                          |                            | Cluster 2 shortened cervix | 1.09 (0.95~1.25)        | 0.24            |                         | 1.10 (0.81~1.49)        | 0.56            |       |
|             |                          | Early preterm              | Cluster 1 stable cervix    | 1.26 (0.92~1.74)        | 0.15            | <0.01                   | 1.00 (0.73~1.36)        | 0.98            | <0.01 |
|             |                          |                            | Cluster 2 shortened cervix | <b>1.47 (1.20~1.80)</b> | <b>&lt;0.01</b> |                         | <b>1.78 (1.27~2.48)</b> | <b>&lt;0.01</b> |       |
|             | 25~28                    | Moderate to late preterm   | Cluster 1 stable cervix    | <b>1.25 (1.07~1.45)</b> | <b>&lt;0.01</b> | 0.21                    | 1.02 (0.82~1.27)        | 0.85            | 0.78  |
|             |                          |                            | Cluster 2 shortened cervix | 1.03 (0.91~1.17)        | 0.59            |                         | 1.01 (0.76~1.35)        | 0.92            |       |
|             |                          | Early preterm              | Cluster 1 stable cervix    | <b>1.60 (1.26~2.02)</b> | <b>&lt;0.01</b> | <0.01                   | 1.05 (0.83~1.34)        | 0.67            | <0.01 |
|             |                          |                            | Cluster 2 shortened cervix | <b>1.92 (1.68~2.20)</b> | <b>&lt;0.01</b> |                         | <b>2.07 (1.53~2.81)</b> | <b>&lt;0.01</b> |       |
| Monocytes   | 1~4                      | Moderate to late preterm   | Cluster 1 stable cervix    | 0.90 (0.66~1.22)        | 0.48            | 0.56                    | 1.08 (0.75~1.54)        | 0.68            | 0.84  |
|             |                          |                            | Cluster 2 shortened cervix | 1.10 (0.89~1.35)        | 0.38            |                         | 0.85 (0.51~1.41)        | 0.53            |       |
|             |                          | Early preterm              | Cluster 1 stable cervix    | 1.56 (0.94~2.60)        | 0.08            | 0.62                    | 1.08 (0.68~1.70)        | 0.76            | 0.36  |
|             |                          |                            | Cluster 2 shortened cervix | 0.76 (0.46~1.24)        | 0.27            |                         | 1.17 (0.70~1.94)        | 0.55            |       |
|             | 5~8                      | Moderate to late preterm   | Cluster 1 stable cervix    | 1.02 (0.90~1.14)        | 0.79            | <0.01                   | 1.14 (0.92~1.40)        | 0.23            | 0.10  |
|             |                          |                            | Cluster 2 shortened cervix | <b>1.15 (1.05~1.25)</b> | <b>&lt;0.01</b> |                         | 1.19 (0.90~1.58)        | 0.22            |       |
|             |                          | Early preterm              | Cluster 1 stable cervix    | <b>1.38 (1.07~1.77)</b> | <b>0.01</b>     | <0.01                   | 1.16 (0.87~1.55)        | 0.31            | <0.01 |
|             |                          |                            | Cluster 2 shortened cervix | <b>1.21 (1.02~1.45)</b> | <b>0.03</b>     |                         | <b>1.51 (1.12~2.03)</b> | <b>&lt;0.01</b> |       |
|             | 9~12                     | Moderate to late preterm   | Cluster 1 stable cervix    | 0.94 (0.75~1.19)        | 0.63            | <0.01                   | 1.08 (0.82~1.42)        | 0.60            | 0.42  |
|             |                          |                            | Cluster 2 shortened cervix | <b>1.30 (1.11~1.52)</b> | <b>&lt;0.01</b> |                         | 0.71 (0.46~1.08)        | 0.11            |       |
|             |                          | Early preterm              | Cluster 1 stable cervix    | 1.15 (0.74~1.79)        | 0.53            | 0.20                    | 1.00 (0.64~1.56)        | 0.99            | 0.23  |
|             |                          |                            | Cluster 2 shortened cervix | 1.19 (0.87~1.62)        | 0.29            |                         | 1.18 (0.74~1.90)        | 0.49            |       |
|             | 13~16                    | Moderate to late preterm   | Cluster 1 stable cervix    | 1.15 (0.89~1.49)        | 0.27            | 0.42                    | 0.78 (0.52~1.19)        | 0.25            | 0.57  |
|             |                          |                            | Cluster 2 shortened cervix | 1.06 (0.86~1.29)        | 0.60            |                         | 0.99 (0.59~1.64)        | 0.96            |       |
|             |                          | Early preterm              | Cluster 1 stable cervix    | 0.97 (0.59~1.59)        | 0.89            | 0.29                    | 0.74 (0.41~1.33)        | 0.31            | 0.65  |
|             |                          |                            | Cluster 2 shortened cervix | 1.19 (0.89~1.59)        | 0.23            |                         | 1.63 (0.94~2.81)        | 0.08            |       |
|             | 17~20                    | Moderate to late preterm   | Cluster 1 stable cervix    | <b>1.23 (1.03~1.46)</b> | <b>0.02</b>     | 0.16                    | 1.25 (0.95~1.65)        | 0.12            | 0.83  |
|             |                          |                            | Cluster 2 shortened cervix | 1.06 (0.92~1.24)        | 0.42            |                         | 1.31 (0.85~2.00)        | 0.22            |       |
|             |                          | Early preterm              | Cluster 1 stable cervix    | 1.27 (0.88~1.83)        | 0.20            | 0.01                    | 0.92 (0.61~1.38)        | 0.68            | 0.13  |
|             |                          |                            | Cluster 2 shortened cervix | <b>1.29 (1.03~1.62)</b> | <b>0.03</b>     |                         | 1.52 (0.95~2.42)        | 0.08            |       |
|             | 21~24                    | Moderate to late preterm   | Cluster 1 stable cervix    | 1.12 (0.94~1.33)        | 0.21            | <0.01                   | 1.22 (0.98~1.52)        | 0.07            | 0.23  |
|             |                          |                            | Cluster 2 shortened cervix | <b>1.27 (1.11~1.45)</b> | <b>&lt;0.01</b> |                         | 1.04 (0.77~1.40)        | 0.81            |       |
|             |                          | Early preterm              | Cluster 1 stable cervix    | <b>1.38 (1.01~1.89)</b> | <b>0.04</b>     | <0.01                   | 1.05 (0.77~1.44)        | 0.75            | <0.01 |
|             |                          |                            | Cluster 2 shortened cervix | <b>1.37 (1.12~1.68)</b> | <b>&lt;0.01</b> |                         | 1.39 (1.01~1.90)        | 0.04            |       |
| 25~28       | Moderate to late preterm | Cluster 1 stable cervix    | <b>1.17 (1.00~1.37)</b>    | <b>0.05</b>             | 0.02            | 1.15 (0.93~1.43)        | 0.21                    | 0.62            |       |
|             |                          | Cluster 2 shortened cervix | <b>1.15 (1.02~1.29)</b>    | <b>0.03</b>             |                 | 1.00 (0.76~1.32)        | 0.99                    |                 |       |
|             | Early preterm            | Cluster 1 stable cervix    | <b>1.60 (1.26~2.02)</b>    | <b>&lt;0.01</b>         | <0.01           | 1.15 (0.91~1.45)        | 0.26                    | <0.01           |       |
|             |                          | Cluster 2 shortened cervix | <b>1.60 (1.40~1.83)</b>    | <b>&lt;0.01</b>         |                 | <b>1.50 (1.14~1.98)</b> | <b>&lt;0.01</b>         |                 |       |
| Eosinophils | 1~4                      | Moderate to late preterm   | Cluster 1 stable cervix    | 0.89 (0.65~1.22)        | 0.46            | 0.43                    | 1.06 (0.75~1.51)        | 0.73            | 0.48  |
|             |                          |                            | Cluster 2 shortened cervix | 0.94 (0.75~1.18)        | 0.62            |                         | 0.71 (0.40~1.23)        | 0.22            |       |
|             |                          | Early preterm              | Cluster 1 stable cervix    | 1.20 (0.67~2.16)        | 0.54            | 0.53                    | 1.07 (0.68~1.70)        | 0.77            | 0.93  |

|           |               |                          |                            |                         |                 |                  |                         |                 |      |
|-----------|---------------|--------------------------|----------------------------|-------------------------|-----------------|------------------|-------------------------|-----------------|------|
|           |               |                          | Cluster 2 shortened cervix | 0.76 (0.45~1.31)        | 0.33            |                  | 0.85 (0.51~1.44)        | 0.55            |      |
|           | 5~8           | Moderate to late preterm | Cluster 1 stable cervix    | 1.08 (0.96~1.20)        | 0.20            | 0.89             | 1.04 (0.85~1.28)        | 0.71            | 0.61 |
|           |               |                          | Cluster 2 shortened cervix | 1.07 (0.99~1.17)        | 0.10            |                  | 0.86 (0.65~1.15)        | 0.31            |      |
|           | 5~8           | Early preterm            | Cluster 1 stable cervix    | 1.25 (0.98~1.59)        | 0.08            | <0.01            | <b>1.40 (1.10~1.77)</b> | <b>&lt;0.01</b> | 0.95 |
|           |               |                          | Cluster 2 shortened cervix | <b>1.21 (1.03~1.43)</b> | <b>0.02</b>     |                  | 0.82 (0.59~1.13)        | 0.22            |      |
|           | 9~12          | Moderate to late preterm | Cluster 1 stable cervix    | 0.85 (0.66~1.09)        | 0.20            | 0.71             | 1.20 (0.93~1.55)        | 0.17            | 0.29 |
|           |               |                          | Cluster 2 shortened cervix | 1.06 (0.90~1.25)        | 0.48            |                  | 0.99 (0.65~1.51)        | 0.98            |      |
|           | 9~12          | Early preterm            | Cluster 1 stable cervix    | 1.14 (0.74~1.74)        | 0.55            | <0.01            | 1.30 (0.87~1.93)        | 0.20            | 0.59 |
|           |               |                          | Cluster 2 shortened cervix | <b>1.45 (1.11~1.90)</b> | <b>&lt;0.01</b> |                  | 1.45 (0.90~2.33)        | 0.12            |      |
|           | 13~16         | Moderate to late preterm | Cluster 1 stable cervix    | 1.03 (0.79~1.33)        | 0.83            | 0.49             | 0.83 (0.56~1.23)        | 0.35            | 0.97 |
|           |               |                          | Cluster 2 shortened cervix | 0.89 (0.72~1.10)        | 0.29            |                  | 1.17 (0.73~1.88)        | 0.51            |      |
|           | 13~16         | Early preterm            | Cluster 1 stable cervix    | 1.18 (0.78~1.80)        | 0.43            | 0.88             | 1.34 (0.86~2.08)        | 0.19            | 0.63 |
|           |               |                          | Cluster 2 shortened cervix | 0.96 (0.70~1.31)        | 0.80            |                  | 0.89 (0.48~1.67)        | 0.73            |      |
|           | 17~20         | Moderate to late preterm | Cluster 1 stable cervix    | 1.11 (0.94~1.32)        | 0.22            | 0.96             | 1.04 (0.78~1.38)        | 0.79            | 0.99 |
|           |               |                          | Cluster 2 shortened cervix | 0.94 (0.81~1.10)        | 0.45            |                  | 0.99 (0.66~1.47)        | 0.95            |      |
|           | 17~20         | Early preterm            | Cluster 1 stable cervix    | 1.23 (0.86~1.75)        | 0.26            | 0.77             | <b>0.56 (0.34~0.94)</b> | <b>0.03</b>     | 0.14 |
|           |               |                          | Cluster 2 shortened cervix | 0.92 (0.71~1.17)        | 0.49            |                  | 0.96 (0.60~1.56)        | 0.88            |      |
|           | 21~24         | Moderate to late preterm | Cluster 1 stable cervix    | 1.10 (0.93~1.30)        | 0.28            | 0.50             | 0.92 (0.73~1.16)        | 0.47            | 0.19 |
|           |               |                          | Cluster 2 shortened cervix | 1.01 (0.88~1.16)        | 0.89            |                  | 0.84 (0.62~1.13)        | 0.24            |      |
|           | 21~24         | Early preterm            | Cluster 1 stable cervix    | 1.19 (0.87~1.63)        | 0.28            | 0.29             | 0.93 (0.68~1.29)        | 0.68            | 0.57 |
|           |               |                          | Cluster 2 shortened cervix | 1.06 (0.86~1.32)        | 0.57            |                  | 0.95 (0.69~1.30)        | 0.74            |      |
|           | 25~28         | Moderate to late preterm | Cluster 1 stable cervix    | 1.04 (0.89~1.22)        | 0.61            | 0.73             | 0.90 (0.72~1.14)        | 0.39            | 0.44 |
|           |               |                          | Cluster 2 shortened cervix | 0.97 (0.86~1.10)        | 0.62            |                  | 0.98 (0.75~1.28)        | 0.88            |      |
|           | 25~28         | Early preterm            | Cluster 1 stable cervix    | 0.89 (0.67~1.19)        | 0.43            | 0.11             | <b>0.66 (0.49~0.89)</b> | <b>&lt;0.01</b> | 0.55 |
|           |               |                          | Cluster 2 shortened cervix | 0.91 (0.78~1.07)        | 0.25            |                  | 1.16 (0.89~1.51)        | 0.28            |      |
| Basophils | 1~4           | Moderate to late preterm | Cluster 1 stable cervix    | 1.09 (0.82~1.46)        | 0.55            | 0.24             | 0.96 (0.65~1.40)        | 0.82            | 0.19 |
|           |               |                          | Cluster 2 shortened cervix | 1.14 (0.92~1.40)        | 0.23            |                  | 0.67 (0.37~1.21)        | 0.18            |      |
|           | 1~4           | Early preterm            | Cluster 1 stable cervix    | 1.55 (0.94~2.56)        | 0.09            | <0.01            | 1.28 (0.84~1.96)        | 0.24            | 0.42 |
|           |               |                          | Cluster 2 shortened cervix | <b>1.51 (1.17~1.94)</b> | <b>&lt;0.01</b> |                  | 1.04 (0.63~1.73)        | 0.87            |      |
|           | 5~8           | Moderate to late preterm | Cluster 1 stable cervix    | 1.04 (0.93~1.17)        | 0.47            | 0.06             | 0.91 (0.73~1.13)        | 0.40            | 0.25 |
|           |               |                          | Cluster 2 shortened cervix | 1.04 (0.96~1.14)        | 0.33            |                  | 0.88 (0.66~1.18)        | 0.40            |      |
|           | 5~8           | Early preterm            | Cluster 1 stable cervix    | 1.10 (0.84~1.43)        | 0.50            | 0.82             | 0.81 (0.59~1.12)        | 0.21            | 0.97 |
|           |               |                          | Cluster 2 shortened cervix | 1.15 (0.98~1.36)        | 0.09            |                  | 1.13 (0.85~1.50)        | 0.39            |      |
|           | 9~12          | Moderate to late preterm | Cluster 1 stable cervix    | 1.03 (0.82~1.28)        | 0.80            | <0.01            | 0.80 (0.59~1.07)        | 0.13            | 0.98 |
|           |               |                          | Cluster 2 shortened cervix | <b>1.18 (1.04~1.35)</b> | <b>0.01</b>     |                  | 1.15 (0.79~1.68)        | 0.47            |      |
|           | 9~12          | Early preterm            | Cluster 1 stable cervix    | 1.27 (0.98~1.63)        | 0.07            | 0.71             | 0.70 (0.41~1.19)        | 0.18            | 0.33 |
|           |               |                          | Cluster 2 shortened cervix | 0.79 (0.53~1.19)        | 0.26            |                  | 0.98 (0.59~1.65)        | 0.95            |      |
|           | 13~16         | Moderate to late preterm | Cluster 1 stable cervix    | 1.24 (0.98~1.56)        | 0.07            | 0.12             | 0.99 (0.68~1.44)        | 0.95            | 0.08 |
|           |               |                          | Cluster 2 shortened cervix | 1.02 (0.84~1.24)        | 0.85            |                  | <b>1.73 (1.04~2.87)</b> | <b>0.04</b>     |      |
| 13~16     | Early preterm | Cluster 1 stable cervix  | <b>1.45 (1.02~2.06)</b>    | <b>0.04</b>             | 0.03            | 1.28 (0.82~2.01) | 0.28                    | 0.16            |      |

|                                |       |                          |                              |                         |                 |       |                         |                 |       |
|--------------------------------|-------|--------------------------|------------------------------|-------------------------|-----------------|-------|-------------------------|-----------------|-------|
|                                |       |                          | Cluster 2 shortened cervix   | 1.19 (0.91~1.54)        | 0.20            |       | 1.43 (0.79~2.59)        | 0.24            |       |
|                                | 17~20 | Moderate to late preterm | Cluster 1 stable cervix      | <b>1.24 (1.05~1.45)</b> | <b>&lt;0.01</b> | <0.01 | 0.97 (0.72~1.32)        | 0.85            | 0.35  |
|                                |       |                          | Cluster 2 shortened cervix   | <b>1.16 (1.03~1.31)</b> | <b>0.01</b>     |       | 0.91 (0.61~1.36)        | 0.64            |       |
|                                |       | Early preterm            | Cluster 1 stable cervix      | 1.16 (0.81~1.66)        | 0.41            | 0.63  | 0.75 (0.48~1.19)        | 0.22            | 0.35  |
|                                |       |                          | Cluster 2 shortened cervix   | 0.88 (0.68~1.15)        | 0.36            |       | 0.89 (0.54~1.45)        | 0.64            |       |
|                                | 21~24 | Moderate to late preterm | Cluster 1 stable cervix      | 1.01 (0.84~1.20)        | 0.95            | 0.82  | 0.94 (0.75~1.18)        | 0.59            | 0.64  |
|                                |       |                          | Cluster 2 shortened cervix   | 1.01 (0.88~1.16)        | 0.88            |       | 0.94 (0.71~1.26)        | 0.70            |       |
|                                |       | Early preterm            | Cluster 1 stable cervix      | 1.25 (0.92~1.69)        | 0.15            | 0.84  | 0.78 (0.55~1.11)        | 0.17            | 0.40  |
|                                |       |                          | Cluster 2 shortened cervix   | 0.93 (0.74~1.18)        | 0.57            |       | 0.97 (0.71~1.34)        | 0.87            |       |
|                                | 25~28 | Moderate to late preterm | Cluster 1 stable cervix      | 1.02 (0.87~1.19)        | 0.84            | 0.80  | 0.92 (0.73~1.15)        | 0.46            | 0.87  |
|                                |       |                          | Cluster 2 shortened cervix   | 1.01 (0.90~1.14)        | 0.83            |       | 1.10 (0.85~1.42)        | 0.48            |       |
|                                |       | Early preterm            | Cluster 1 stable cervix      | 0.92 (0.70~1.23)        | 0.59            | 0.71  | <b>0.67 (0.50~0.90)</b> | <b>&lt;0.01</b> | 0.46  |
|                                |       |                          | Cluster 2 shortened cervix   | 0.99 (0.84~1.15)        | 0.85            |       | 1.11 (0.85~1.46)        | 0.43            |       |
| Neutrophil-to-lymphocyte ratio | 1~4   | Moderate to late preterm | Cluster 1 stable subgroup    | 1.02 (0.77~1.35)        | 0.89            | 0.75  | 0.94 (0.65~1.37)        | 0.75            | 0.93  |
|                                |       |                          | Cluster 2 shortened subgroup | 1.08 (0.90~1.30)        | 0.42            |       | 1.01 (0.61~1.68)        | 0.96            |       |
|                                |       | Early preterm            | Cluster 1 stable subgroup    | 0.79 (0.37~1.69)        | 0.54            | 0.94  | 1.19 (0.77~1.84)        | 0.42            | 0.96  |
|                                |       |                          | Cluster 2 shortened subgroup | 0.82 (0.47~1.43)        | 0.48            |       | 1.17 (0.72~1.93)        | 0.52            |       |
|                                | 5~8   | Moderate to late preterm | Cluster 1 stable subgroup    | 1.08 (0.97~1.20)        | 0.15            | 0.81  | 1.00 (0.81~1.24)        | 0.98            | 0.03  |
|                                |       |                          | Cluster 2 shortened subgroup | 1.05 (0.97~1.15)        | 0.23            |       | <b>1.43 (1.08~1.89)</b> | <b>0.01</b>     |       |
|                                |       | Early preterm            | Cluster 1 stable subgroup    | <b>1.22 (1.01~1.46)</b> | <b>0.04</b>     | 0.26  | 0.70 (0.48~1.01)        | 0.06            | <0.01 |
|                                |       |                          | Cluster 2 shortened subgroup | 1.03 (0.85~1.24)        | 0.77            |       | <b>1.62 (1.21~2.18)</b> | <b>&lt;0.01</b> |       |
|                                | 9~12  | Moderate to late preterm | Cluster 1 stable subgroup    | 0.96 (0.76~1.22)        | 0.76            | 0.29  | 0.76 (0.54~1.09)        | 0.13            | 0.42  |
|                                |       |                          | Cluster 2 shortened subgroup | 1.12 (0.97~1.29)        | 0.12            |       | 0.87 (0.58~1.30)        | 0.50            |       |
|                                |       | Early preterm            | Cluster 1 stable subgroup    | 0.73 (0.38~1.39)        | 0.33            | 0.95  | 0.96 (0.62~1.49)        | 0.86            | 0.41  |
|                                |       |                          | Cluster 2 shortened subgroup | 0.71 (0.45~1.13)        | 0.15            |       | 1.21 (0.76~1.93)        | 0.42            |       |
|                                | 13~16 | Moderate to late preterm | Cluster 1 stable subgroup    | 0.96 (0.73~1.27)        | 0.79            | 0.66  | 0.84 (0.56~1.27)        | 0.42            | 0.13  |
|                                |       |                          | Cluster 2 shortened subgroup | 0.91 (0.70~1.17)        | 0.45            |       | 1.43 (0.86~2.37)        | 0.17            |       |
|                                |       | Early preterm            | Cluster 1 stable subgroup    | 1.28 (0.91~1.82)        | 0.16            | 0.29  | 1.00 (0.61~1.64)        | 1.00            | 0.07  |
|                                |       |                          | Cluster 2 shortened subgroup | 0.99 (0.73~1.33)        | 0.92            |       | <b>1.85 (1.03~2.98)</b> | <b>0.04</b>     |       |
|                                | 17~20 | Moderate to late preterm | Cluster 1 stable subgroup    | 1.09 (0.92~1.28)        | 0.32            | 0.78  | 1.13 (0.87~1.47)        | 0.37            | 0.46  |
|                                |       |                          | Cluster 2 shortened subgroup | 1.06 (0.92~1.22)        | 0.43            |       | 1.34 (0.86~2.09)        | 0.20            |       |
|                                |       | Early preterm            | Cluster 1 stable subgroup    | 1.21 (0.94~1.55)        | 0.14            | 0.37  | 0.70 (0.43~1.14)        | 0.15            | <0.01 |
|                                |       |                          | Cluster 2 shortened subgroup | 1.05 (0.83~1.32)        | 0.68            |       | <b>1.65 (1.03~2.65)</b> | <b>0.04</b>     |       |
|                                | 21~24 | Moderate to late preterm | Cluster 1 stable subgroup    | 1.01 (0.85~1.20)        | 0.89            | 0.49  | 1.11 (0.93~1.33)        | 0.26            | 0.25  |
|                                |       |                          | Cluster 2 shortened subgroup | 1.08 (0.96~1.22)        | 0.19            |       | <b>1.38 (1.00~1.90)</b> | <b>0.05</b>     |       |
|                                |       | Early preterm            | Cluster 1 stable subgroup    | 1.04 (0.78~1.40)        | 0.78            | 0.52  | 1.01 (0.72~1.42)        | 0.96            | <0.01 |
|                                |       |                          | Cluster 2 shortened subgroup | <b>1.16 (1.01~1.33)</b> | <b>0.03</b>     |       | <b>2.08 (1.48~2.94)</b> | <b>&lt;0.01</b> |       |
|                                | 25~28 | Moderate to late preterm | Cluster 1 stable subgroup    | 1.08 (0.94~1.24)        | 0.29            | 0.44  | 1.05 (0.84~1.31)        | 0.68            | 0.33  |
|                                |       |                          | Cluster 2 shortened subgroup | 1.00 (0.88~1.13)        | 0.95            |       | 1.25 (0.93~1.67)        | 0.14            |       |
|                                |       | Early preterm            | Cluster 1 stable subgroup    | <b>1.21 (1.02~1.45)</b> | <b>0.03</b>     | 0.17  | 1.21 (0.97~1.52)        | 0.09            | 0.14  |

|                              |                          |                              |                              |                         |                 |                  |                         |                 |       |
|------------------------------|--------------------------|------------------------------|------------------------------|-------------------------|-----------------|------------------|-------------------------|-----------------|-------|
|                              |                          |                              | Cluster 2 shortened subgroup | <b>1.39 (1.26~1.52)</b> | <b>&lt;0.01</b> |                  | <b>1.58 (1.18~2.11)</b> | <b>&lt;0.01</b> |       |
| Lymphocyte-to-monocyte ratio | 1~4                      | Moderate to late preterm     | Cluster 1 stable subgroup    | 0.94 (0.70~1.27)        | 0.70            | 0.72             | 1.10 (0.76~1.59)        | 0.62            | 0.91  |
|                              |                          |                              | Cluster 2 shortened subgroup | 0.87 (0.68~1.10)        | 0.24            |                  | 1.01 (0.63~1.61)        | 0.98            |       |
|                              |                          | Early preterm                | Cluster 1 stable subgroup    | 0.87 (0.44~1.70)        | 0.67            | 0.12             | 1.33 (0.86~2.06)        | 0.19            | 0.09  |
|                              |                          |                              | Cluster 2 shortened subgroup | <b>1.47 (1.11~1.95)</b> | <b>&lt;0.01</b> |                  | 0.76 (0.43~1.34)        | 0.34            |       |
|                              | 5~8                      | Moderate to late preterm     | Cluster 1 stable subgroup    | 0.93 (0.82~1.05)        | 0.22            | 0.56             | 0.94 (0.76~1.17)        | 0.60            | 0.04  |
|                              |                          |                              | Cluster 2 shortened subgroup | <b>0.90 (0.82~0.99)</b> | <b>0.03</b>     |                  | <b>0.66 (0.49~0.90)</b> | <b>&lt;0.01</b> |       |
|                              |                          | Early preterm                | Cluster 1 stable subgroup    | 0.85 (0.62~1.18)        | 0.34            | 0.36             | 1.14 (0.86~1.51)        | 0.35            | <0.01 |
|                              |                          |                              | Cluster 2 shortened subgroup | 0.99 (0.81~1.20)        | 0.88            |                  | <b>0.63 (0.45~0.89)</b> | <b>&lt;0.01</b> |       |
|                              | 9~12                     | Moderate to late preterm     | Cluster 1 stable subgroup    | 1.10 (0.89~1.37)        | 0.38            | 0.03             | 1.01 (0.76~1.33)        | 0.96            | 0.25  |
|                              |                          |                              | Cluster 2 shortened subgroup | <b>0.79 (0.66~0.96)</b> | <b>0.02</b>     |                  | 1.32 (0.91~1.92)        | 0.15            |       |
|                              |                          | Early preterm                | Cluster 1 stable subgroup    | 0.87 (0.53~1.44)        | 0.60            | 0.29             | 1.38 (0.94~2.04)        | 0.10            | 0.18  |
|                              |                          |                              | Cluster 2 shortened subgroup | 1.22 (0.90~1.65)        | 0.20            |                  | 0.87 (0.51~1.48)        | 0.61            |       |
|                              | 13~16                    | Moderate to late preterm     | Cluster 1 stable subgroup    | 1.06 (0.83~1.37)        | 0.63            | 0.83             | 1.22 (0.85~1.76)        | 0.28            | 0.75  |
|                              |                          |                              | Cluster 2 shortened subgroup | 1.09 (0.89~1.33)        | 0.41            |                  | 1.06 (0.66~1.71)        | 0.81            |       |
|                              |                          | Early preterm                | Cluster 1 stable subgroup    | 1.10 (0.70~1.71)        | 0.68            | 0.77             | 1.61 (0.99~2.61)        | 0.05            | 0.09  |
|                              |                          |                              | Cluster 2 shortened subgroup | 1.16 (0.87~1.55)        | 0.30            |                  | 0.71 (0.40~1.26)        | 0.24            |       |
|                              | 17~20                    | Moderate to late preterm     | Cluster 1 stable subgroup    | 0.90 (0.74~1.09)        | 0.27            | 0.67             | 0.78 (0.57~1.06)        | 0.11            | 1.00  |
|                              |                          |                              | Cluster 2 shortened subgroup | 0.95 (0.81~1.10)        | 0.49            |                  | 0.77 (0.50~1.20)        | 0.25            |       |
|                              |                          | Early preterm                | Cluster 1 stable subgroup    | 0.80 (0.52~1.25)        | 0.33            | 0.60             | 1.23 (0.85~1.78)        | 0.27            | 0.35  |
|                              |                          |                              | Cluster 2 shortened subgroup | 0.90 (0.70~1.16)        | 0.43            |                  | 0.59 (0.35~1.01)        | 0.06            |       |
|                              | 21~24                    | Moderate to late preterm     | Cluster 1 stable subgroup    | 0.87 (0.72~1.05)        | 0.14            | 0.22             | <b>0.72 (0.56~0.92)</b> | <b>&lt;0.01</b> | 0.69  |
|                              |                          |                              | Cluster 2 shortened subgroup | <b>0.75 (0.64~0.88)</b> | <b>&lt;0.01</b> |                  | 0.78 (0.58~1.05)        | 0.11            |       |
|                              |                          | Early preterm                | Cluster 1 stable subgroup    | 0.91 (0.63~1.30)        | 0.59            | 0.40             | 0.92 (0.67~1.26)        | 0.60            | 0.01  |
|                              |                          |                              | Cluster 2 shortened subgroup | <b>0.74 (0.58~0.96)</b> | <b>0.02</b>     |                  | <b>0.52 (0.35~0.76)</b> | <b>&lt;0.01</b> |       |
| 25~28                        | Moderate to late preterm | Cluster 1 stable subgroup    | 0.90 (0.76~1.06)             | 0.20                    | 1.00            | 0.82 (0.65~1.04) | 0.10                    | 0.86            |       |
|                              |                          | Cluster 2 shortened subgroup | 0.90 (0.79~1.02)             | 0.10                    |                 | 0.79 (0.61~1.04) | 0.09                    |                 |       |
|                              | Early preterm            | Cluster 1 stable subgroup    | 0.77 (0.58~1.04)             | 0.09                    | 0.58            | 0.90 (0.70~1.16) | 0.42                    | 0.55            |       |
|                              |                          | Cluster 2 shortened subgroup | <b>0.68 (0.57~0.81)</b>      | <b>&lt;0.01</b>         |                 | 0.79 (0.60~1.04) | 0.09                    |                 |       |
