# Supplementary material for: Longitudinal Cervical Length Measurements and Spontaneous Preterm Birth in Singleton and Twin Pregnancies
Source: PubMed Central journal article supplement (PMC11009824; doi:10.1001/jamanetworkopen.2024.4592), 2024-04-11
Supplement: jamanetwopen-e244592-s002.pdf [file jamanetwopen-e244592-s002.pdf]

## Data Sharing Statement

Wu. Longitudinal Cervical Length Measurements and Spontaneous Preterm Birth in Singleton and Twin Pregnancies. *JAMA Netw Open*. Published April 11, 2024.  
doi:10.1001/jamanetworkopen.2024.4592

### Data

**Data available:** No
